# Supplementary material
Source: publisher figshare collection journal article supplement (https://tandf.figshare.com/ndownloader/files/15634229)
Supplement: Supplementary file 1 [file 15634229]

Solvent free synthesis of 1-alkoxyphosphonium chlorides for stereoselective multipurpose vinyl ethers

Zain Maqsood CHEEMA1, Humaira Yasmeen GONDAL*1, Hina SIDDIQUI, 2 Muhammad Iqbal CHOUDHARY2

1Department of Chemistry, University of Sargodha, Sargodha, 40100, Pakistan

2H.E.J Research Institute of Chemistry, International Center for Chemical and Biological

Email: [hygondal@yahoo.com](mailto:hygondal@yahoo.com)

**Figure S 1:** 1H NMR of 3aS1a-b

**Figure S 2:** 13C NMR of 3a S1a-b

**
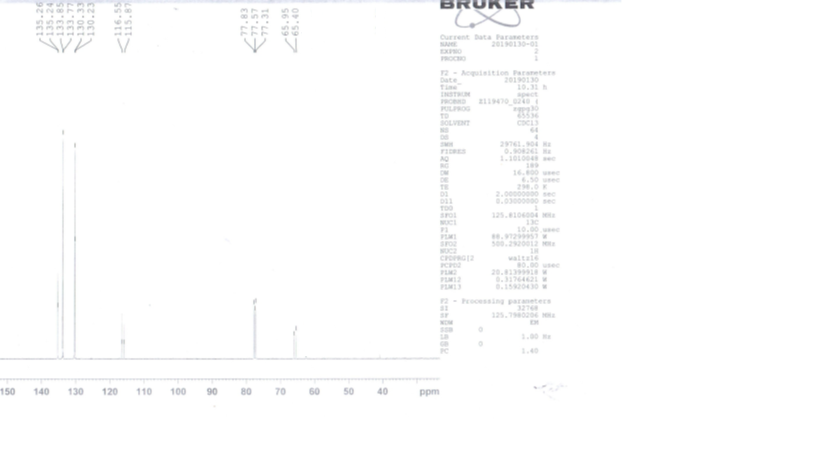
**

**Figure S 3:** 31P NMR of 3a S1a-b


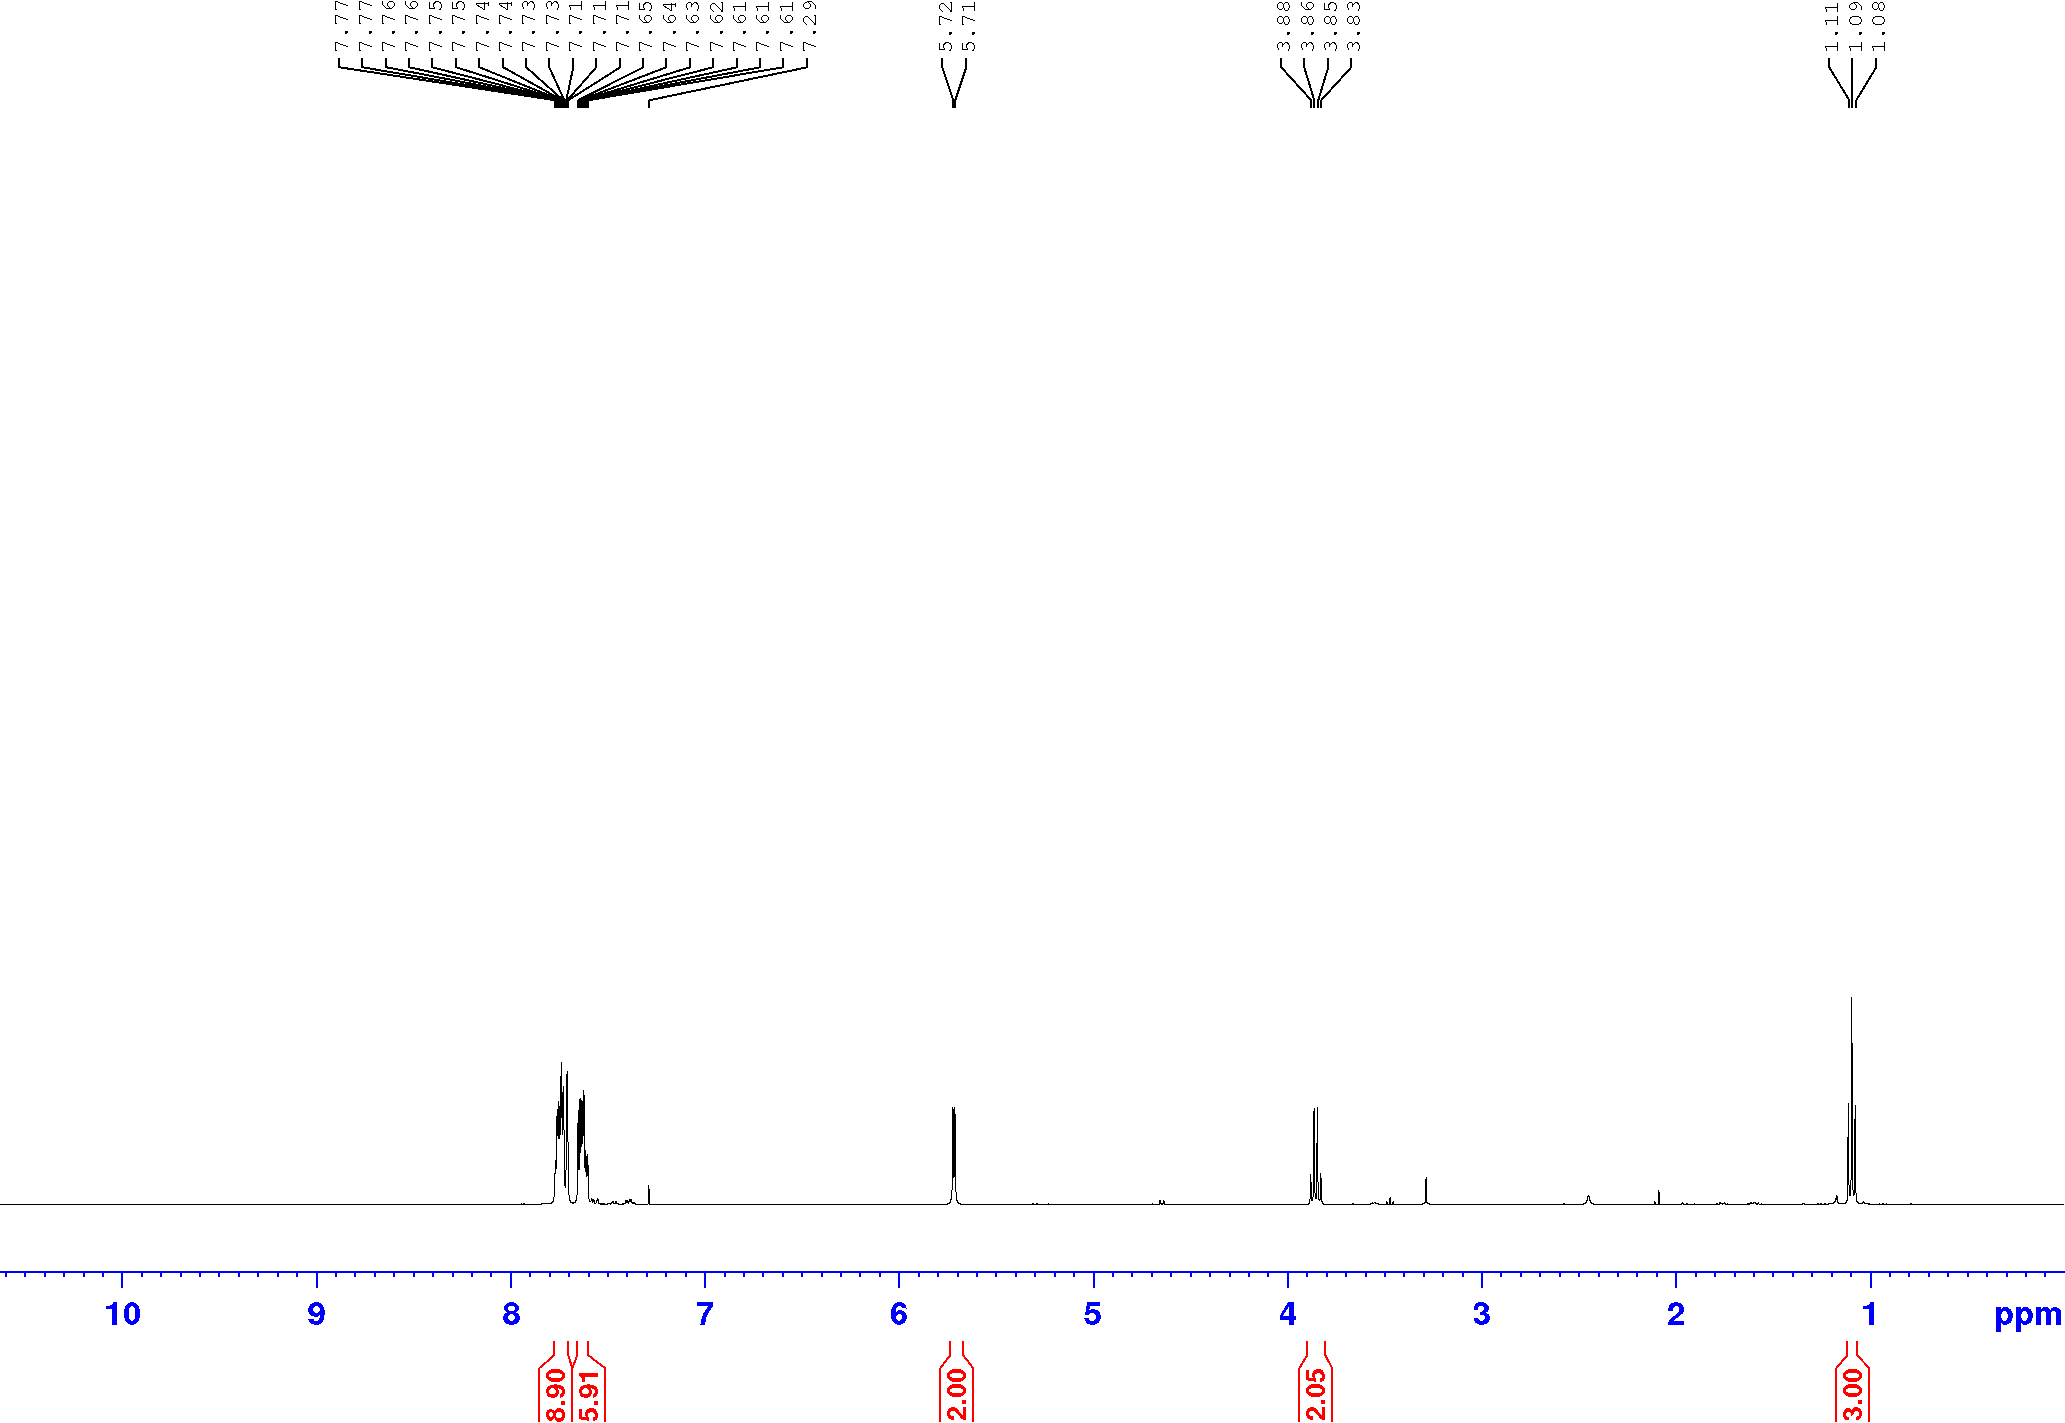
**Figure S 4:** 1HNMR of 3b S1b


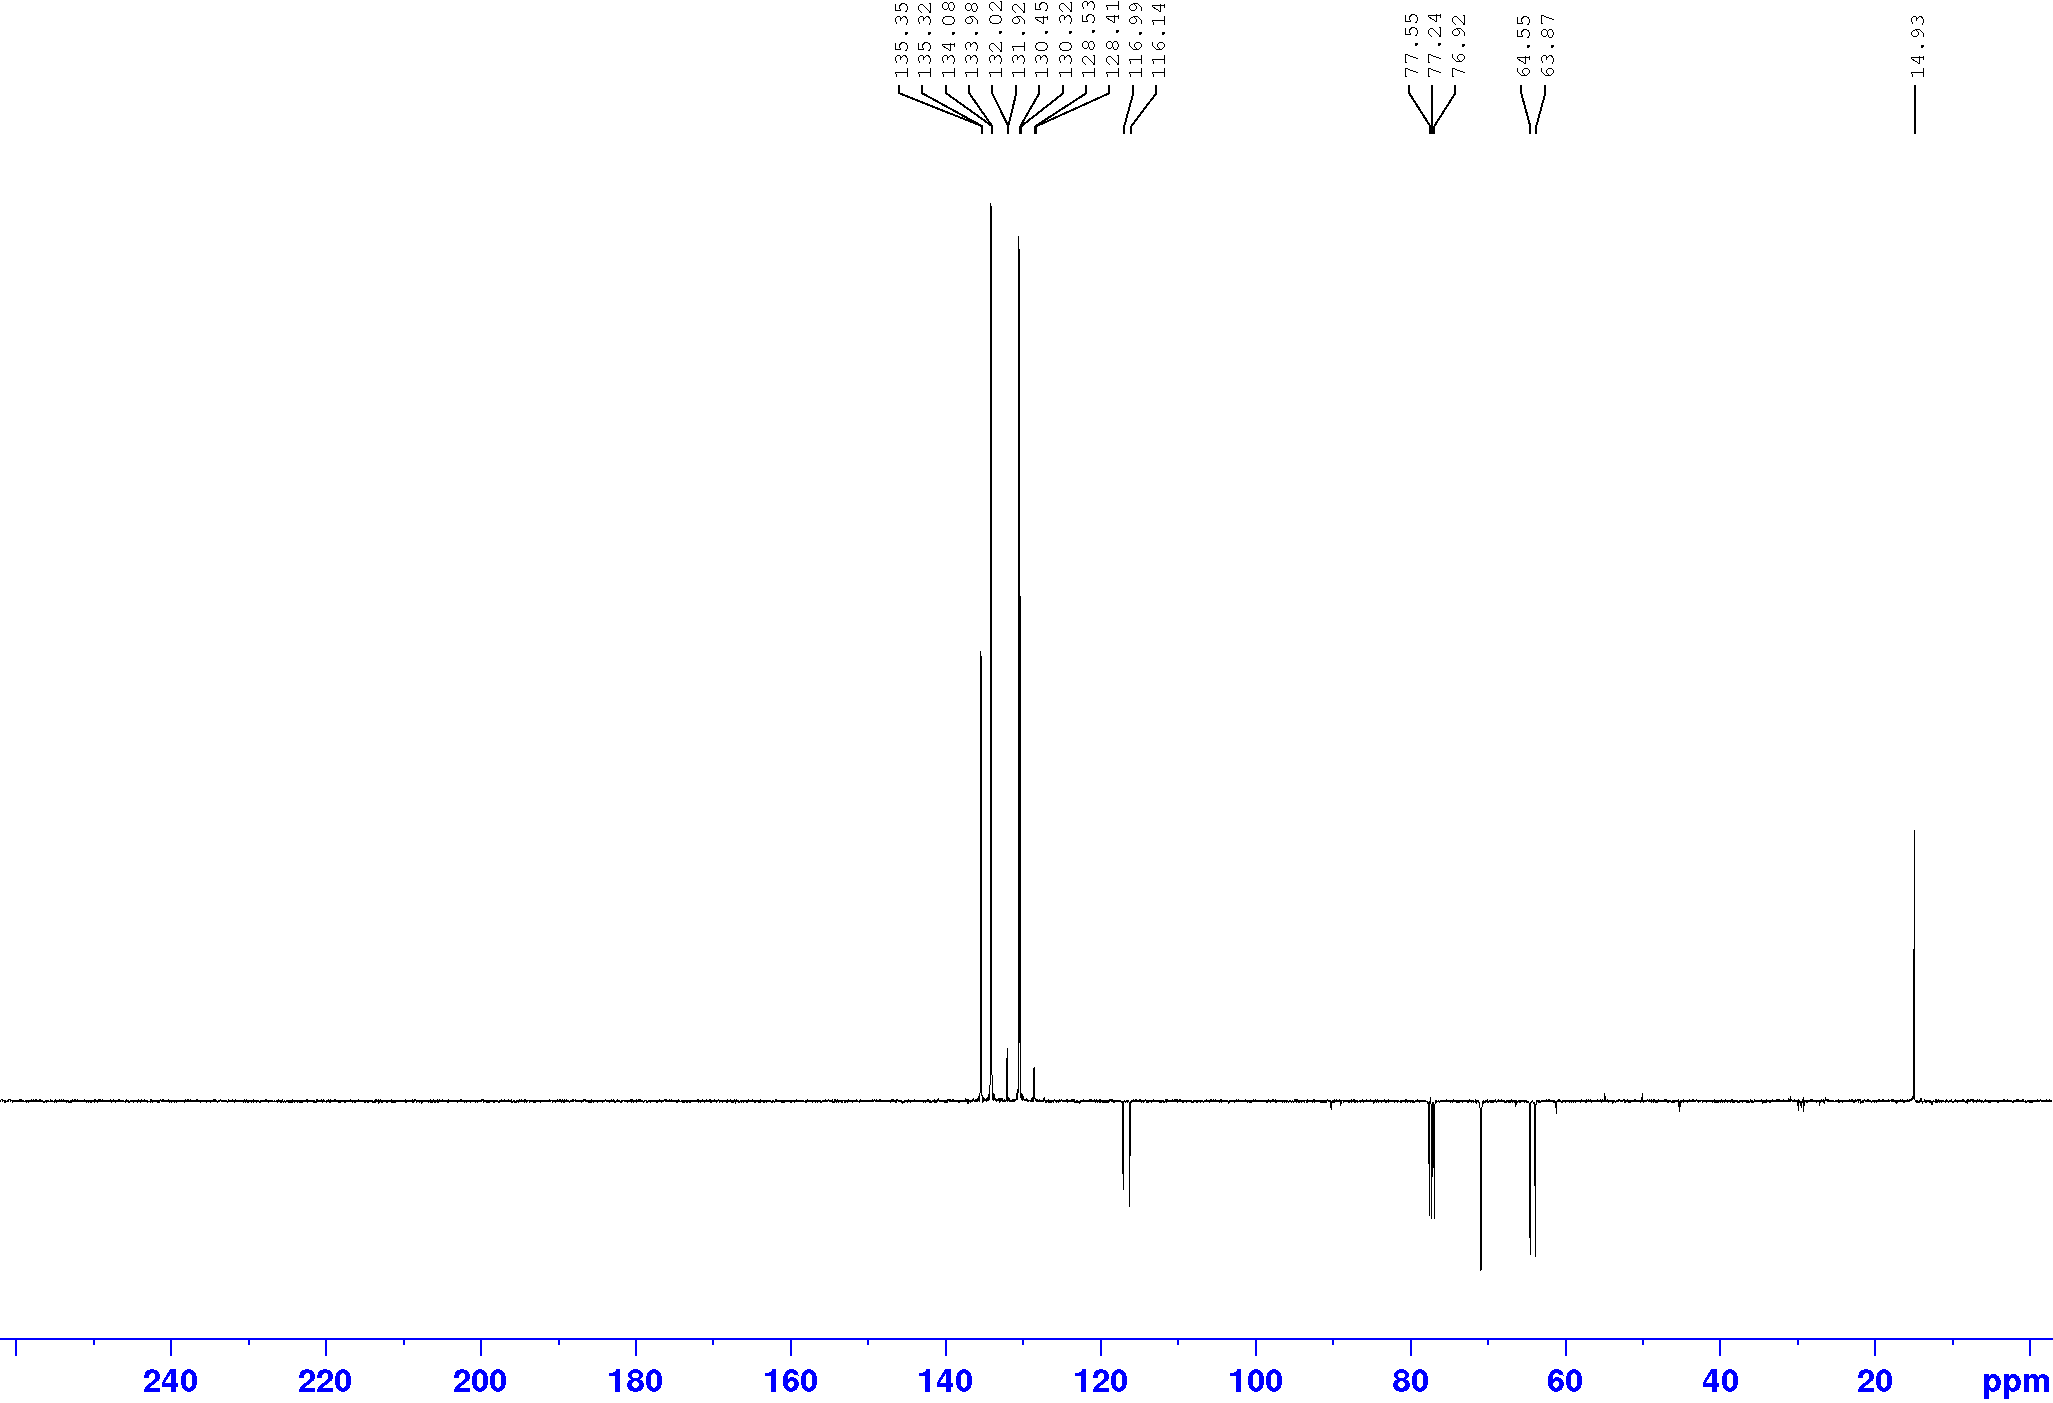
**Figure S 5:** 13CNMR of 3b S1b

**Figure S 6:** 31PNMR of 3b S1b


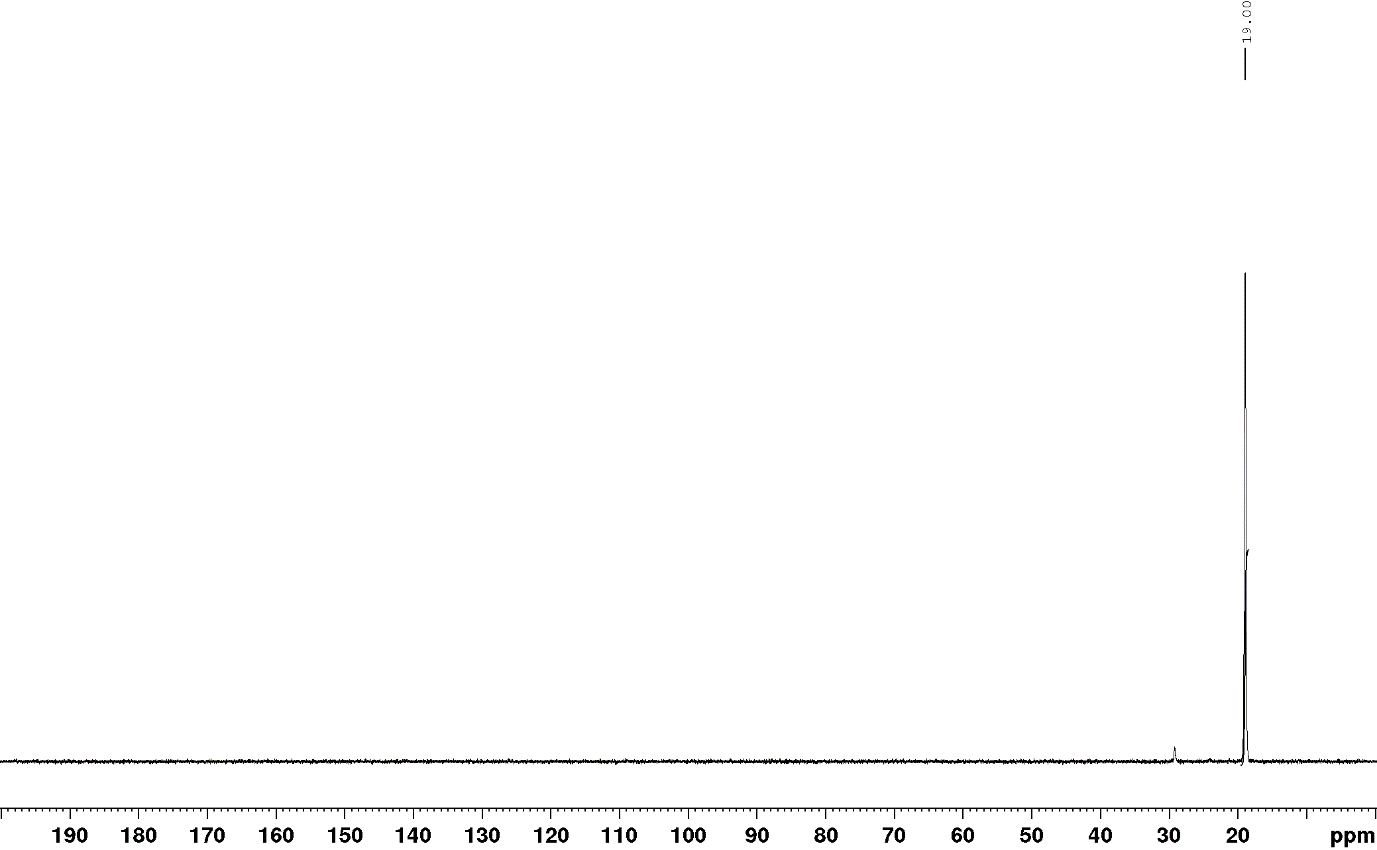


**Figure S 7:** 1HNMR of 3c S2

**Figure S 8:** 1HNMR of 3d S3

**Figure S 9:** 13C-NMR of 3d


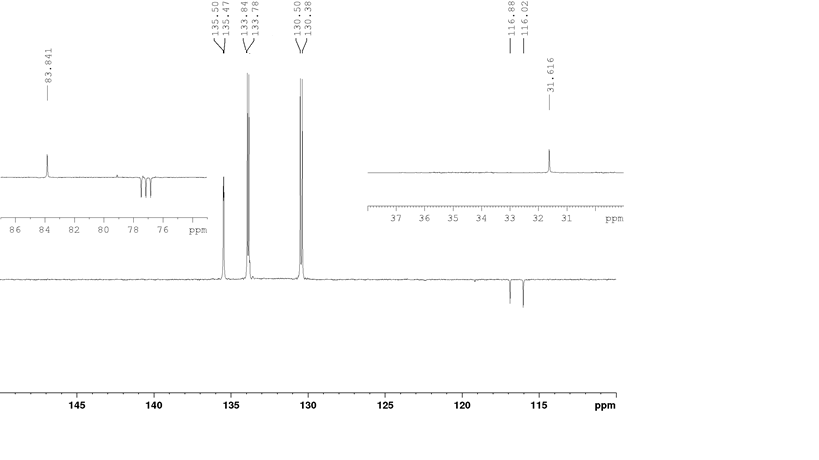


**Figure S 10:** 31PNMR of 3d

**Figure S 11:** 1HNMR of 3e

**Figure S 12:** 13CNMR of 3e


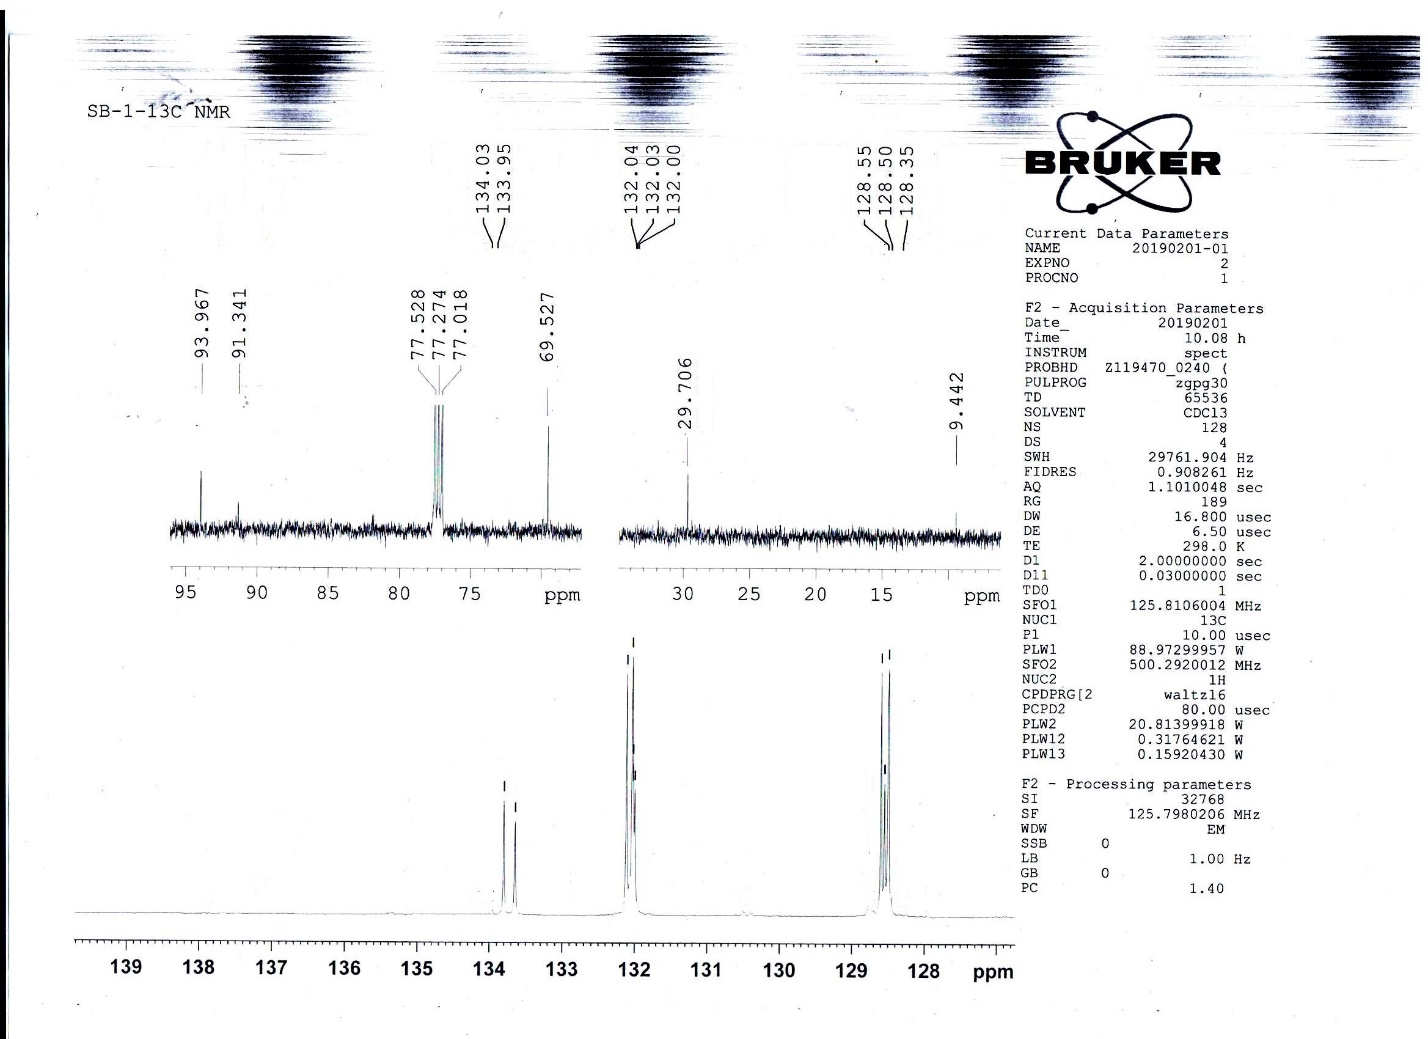


**Figure S 13:** 31PNMR of 3e

**Figure S 14:** 1HNMR of 3f S4

**Figure S 15:** 1HNMR of 4b′

**Figure S 16:** 13CNMR of 4b′


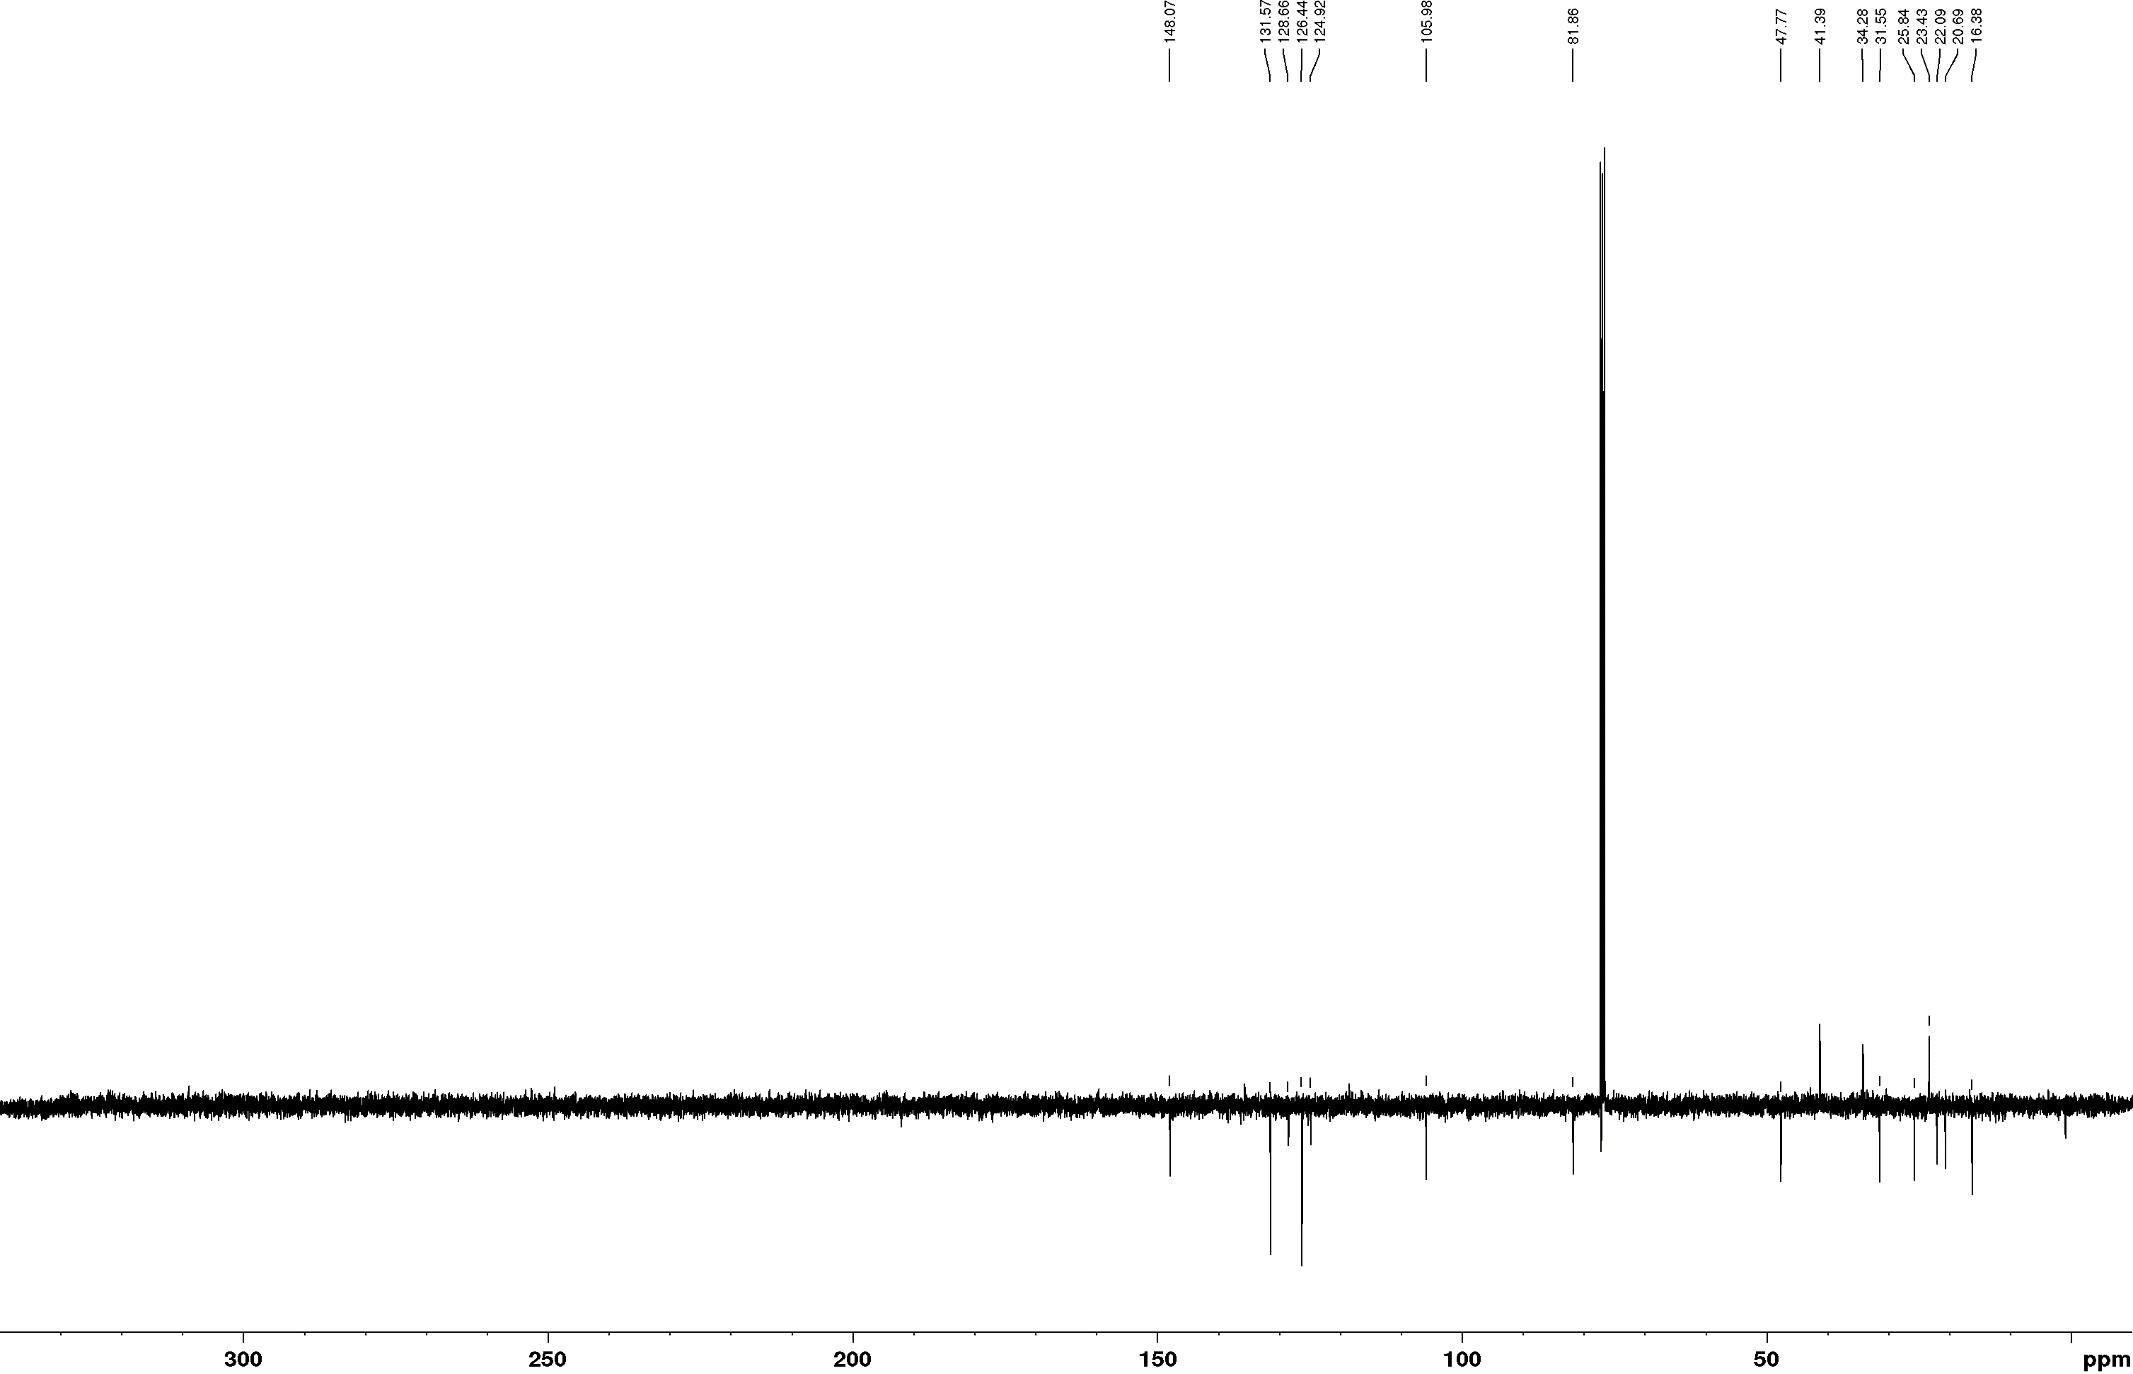


**
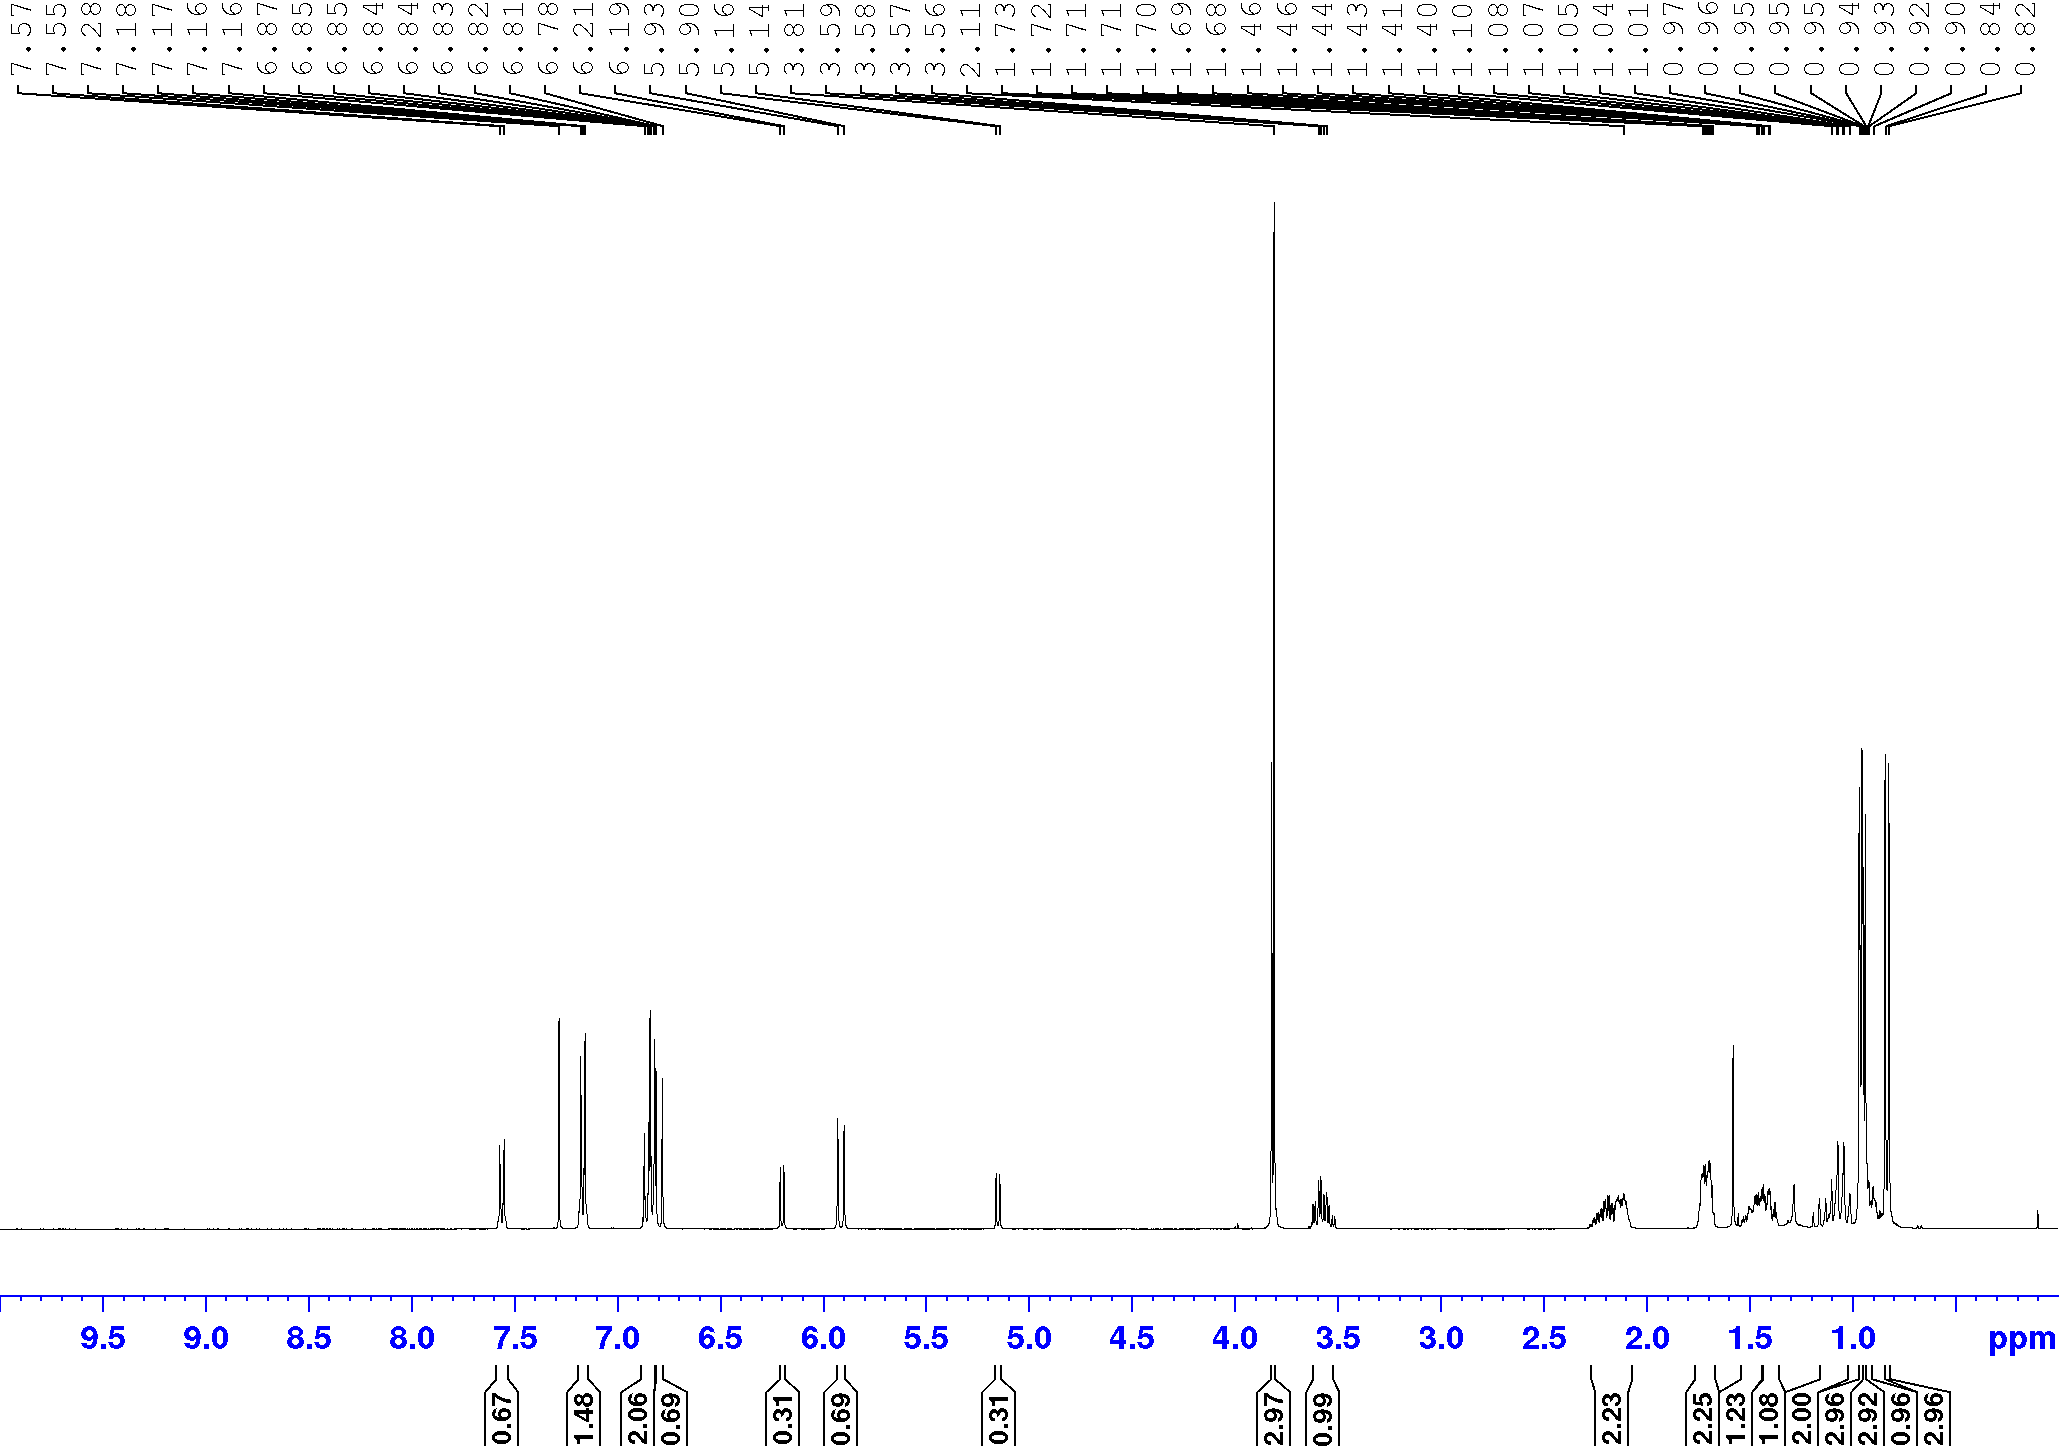
Figure S 17:** 1HNMR of 4c-c′

**Figure S 18:** 13CNMR of 4c-c′


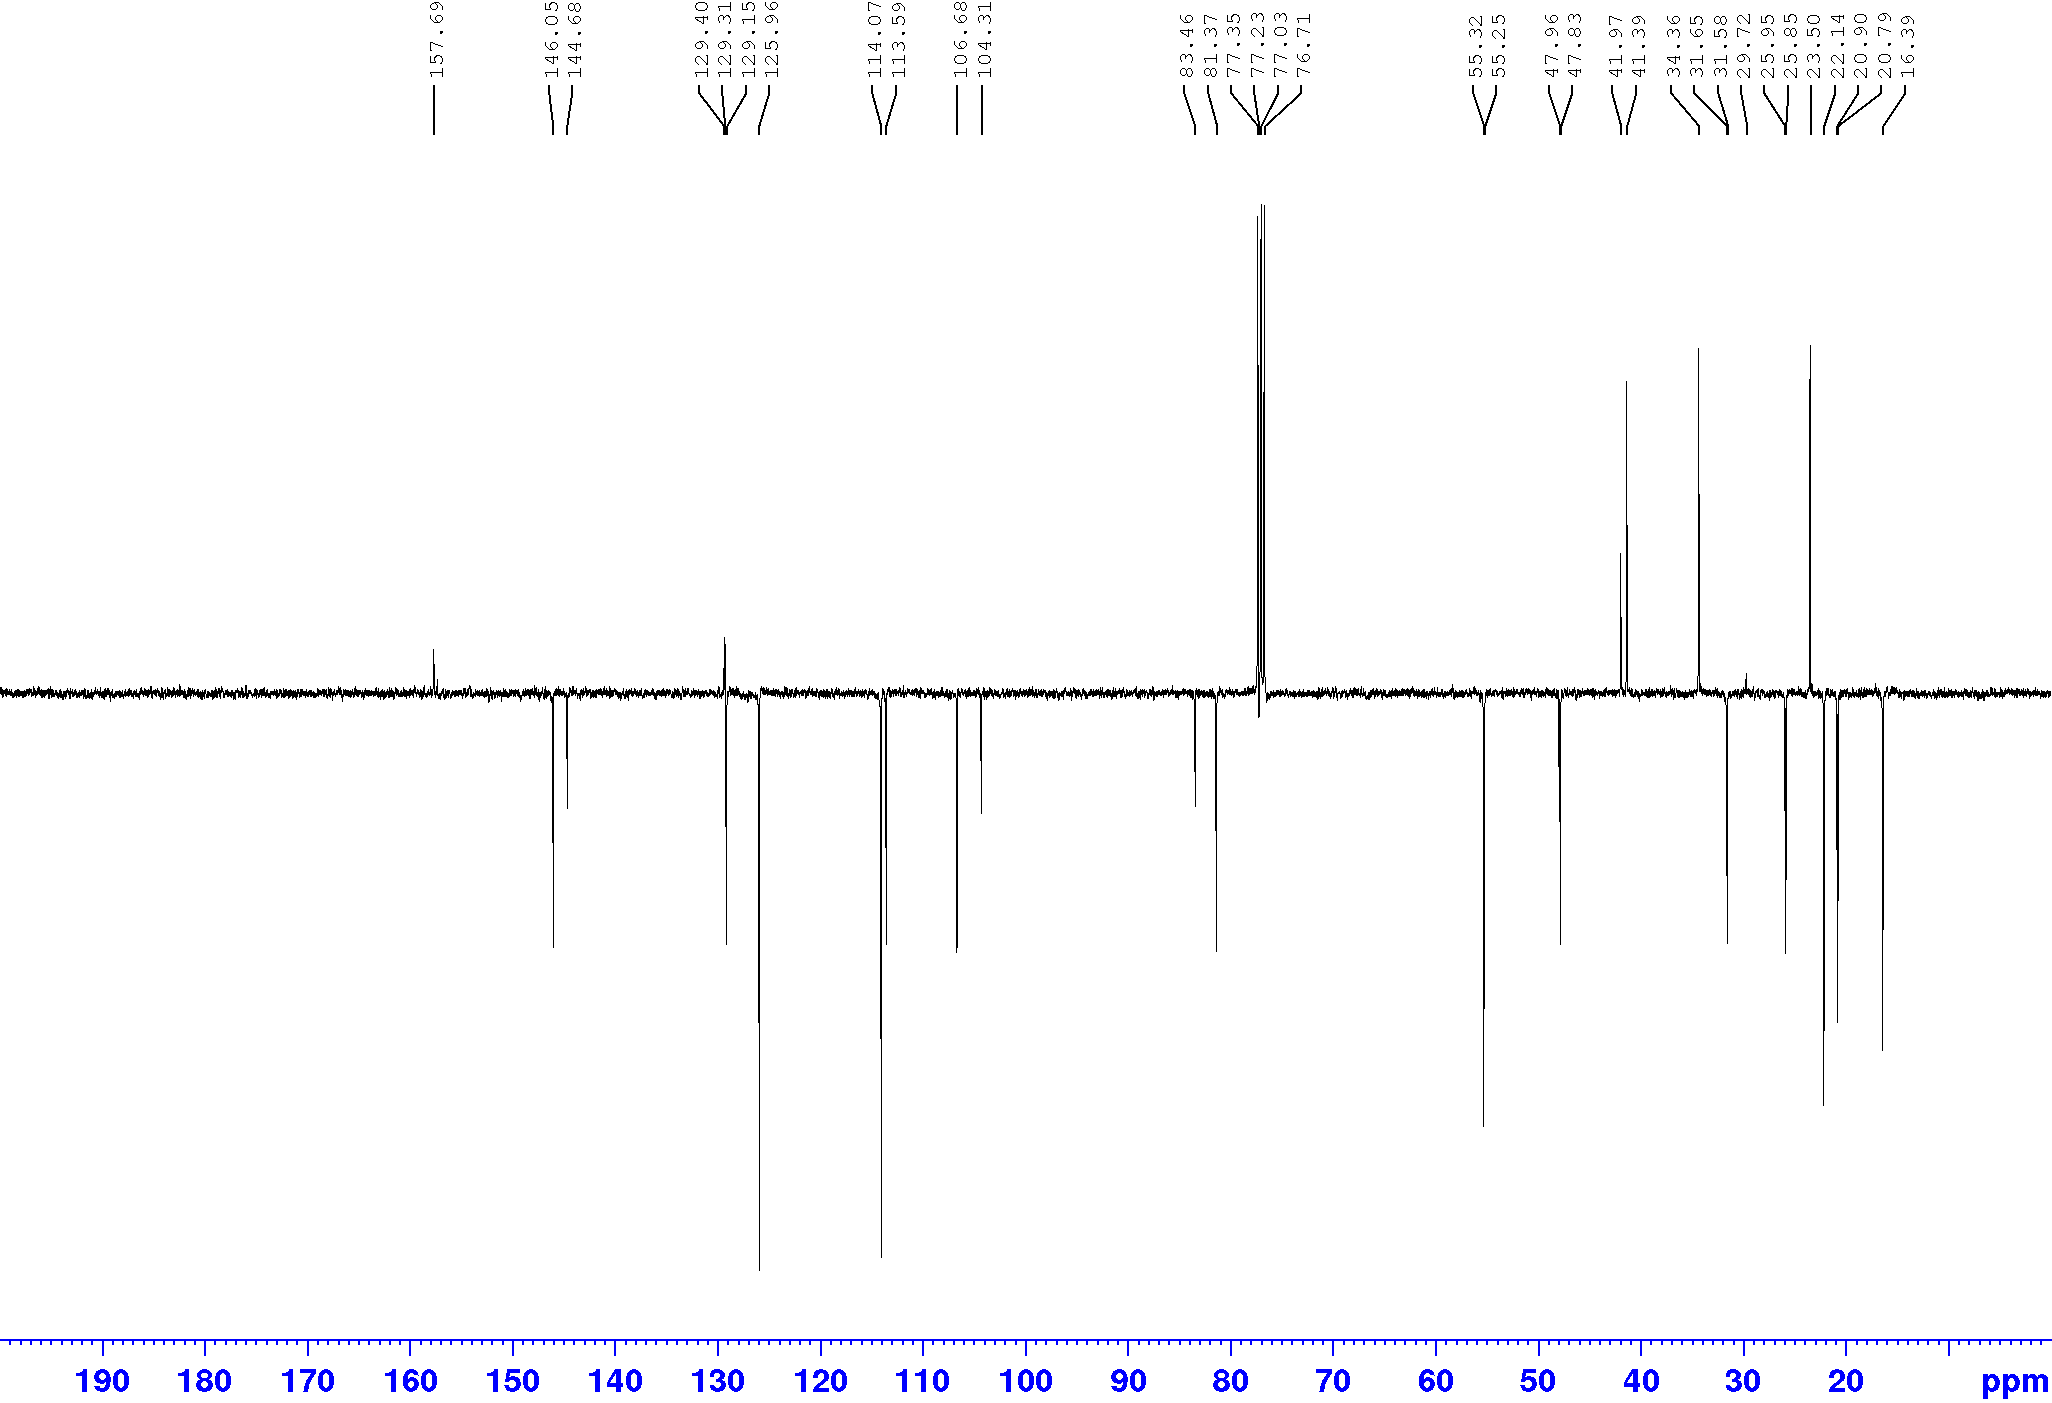


**Figure S 19:** 1HNMR of 4d-d′


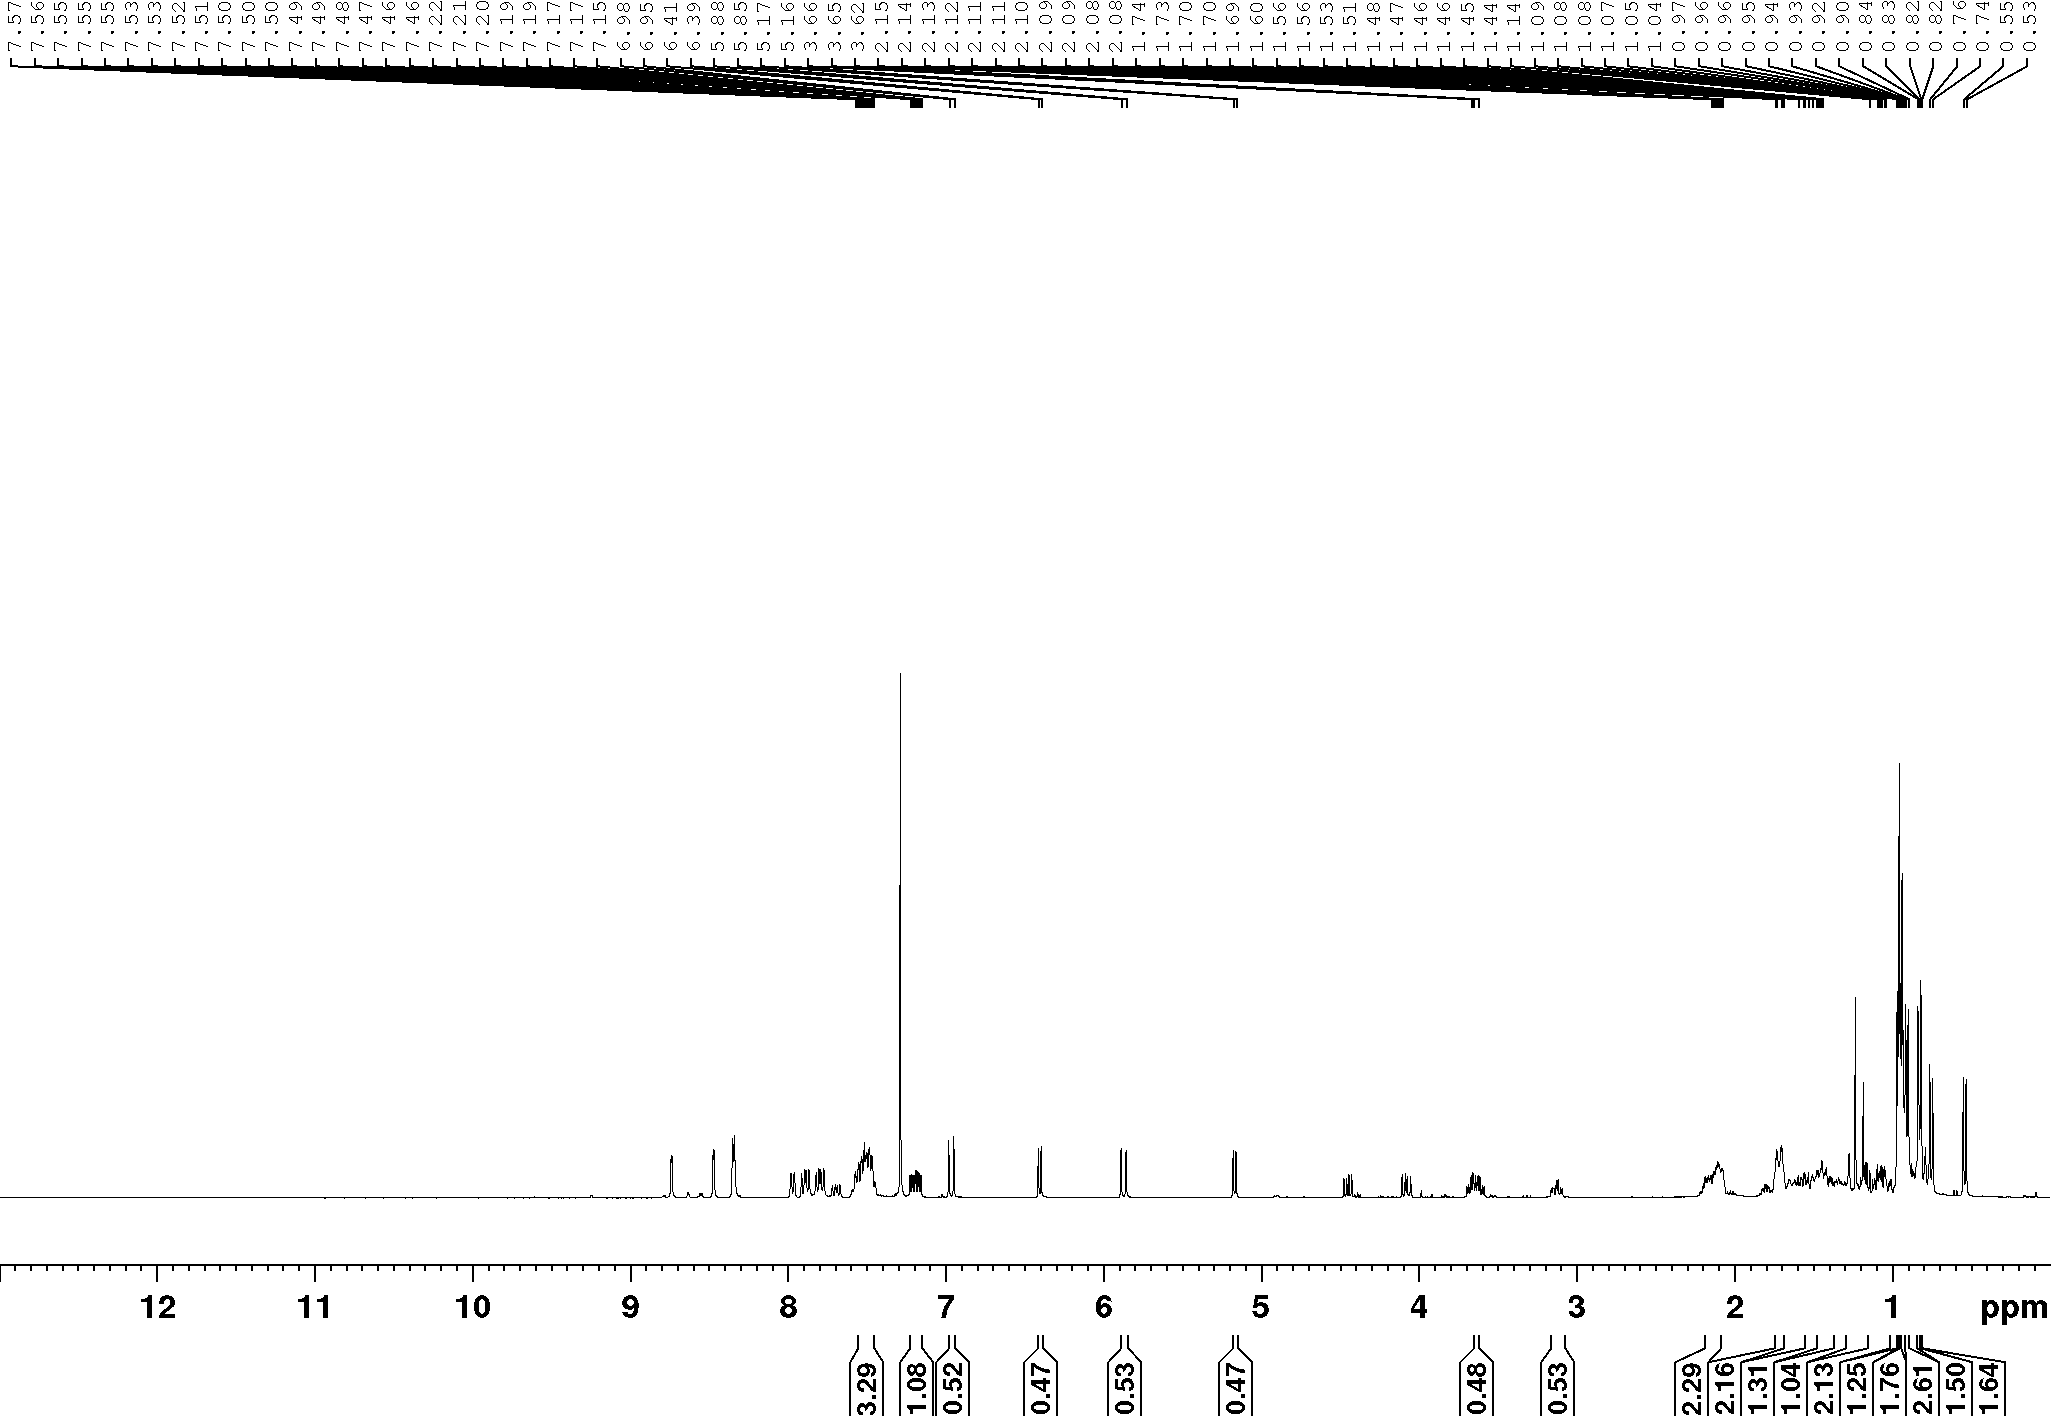

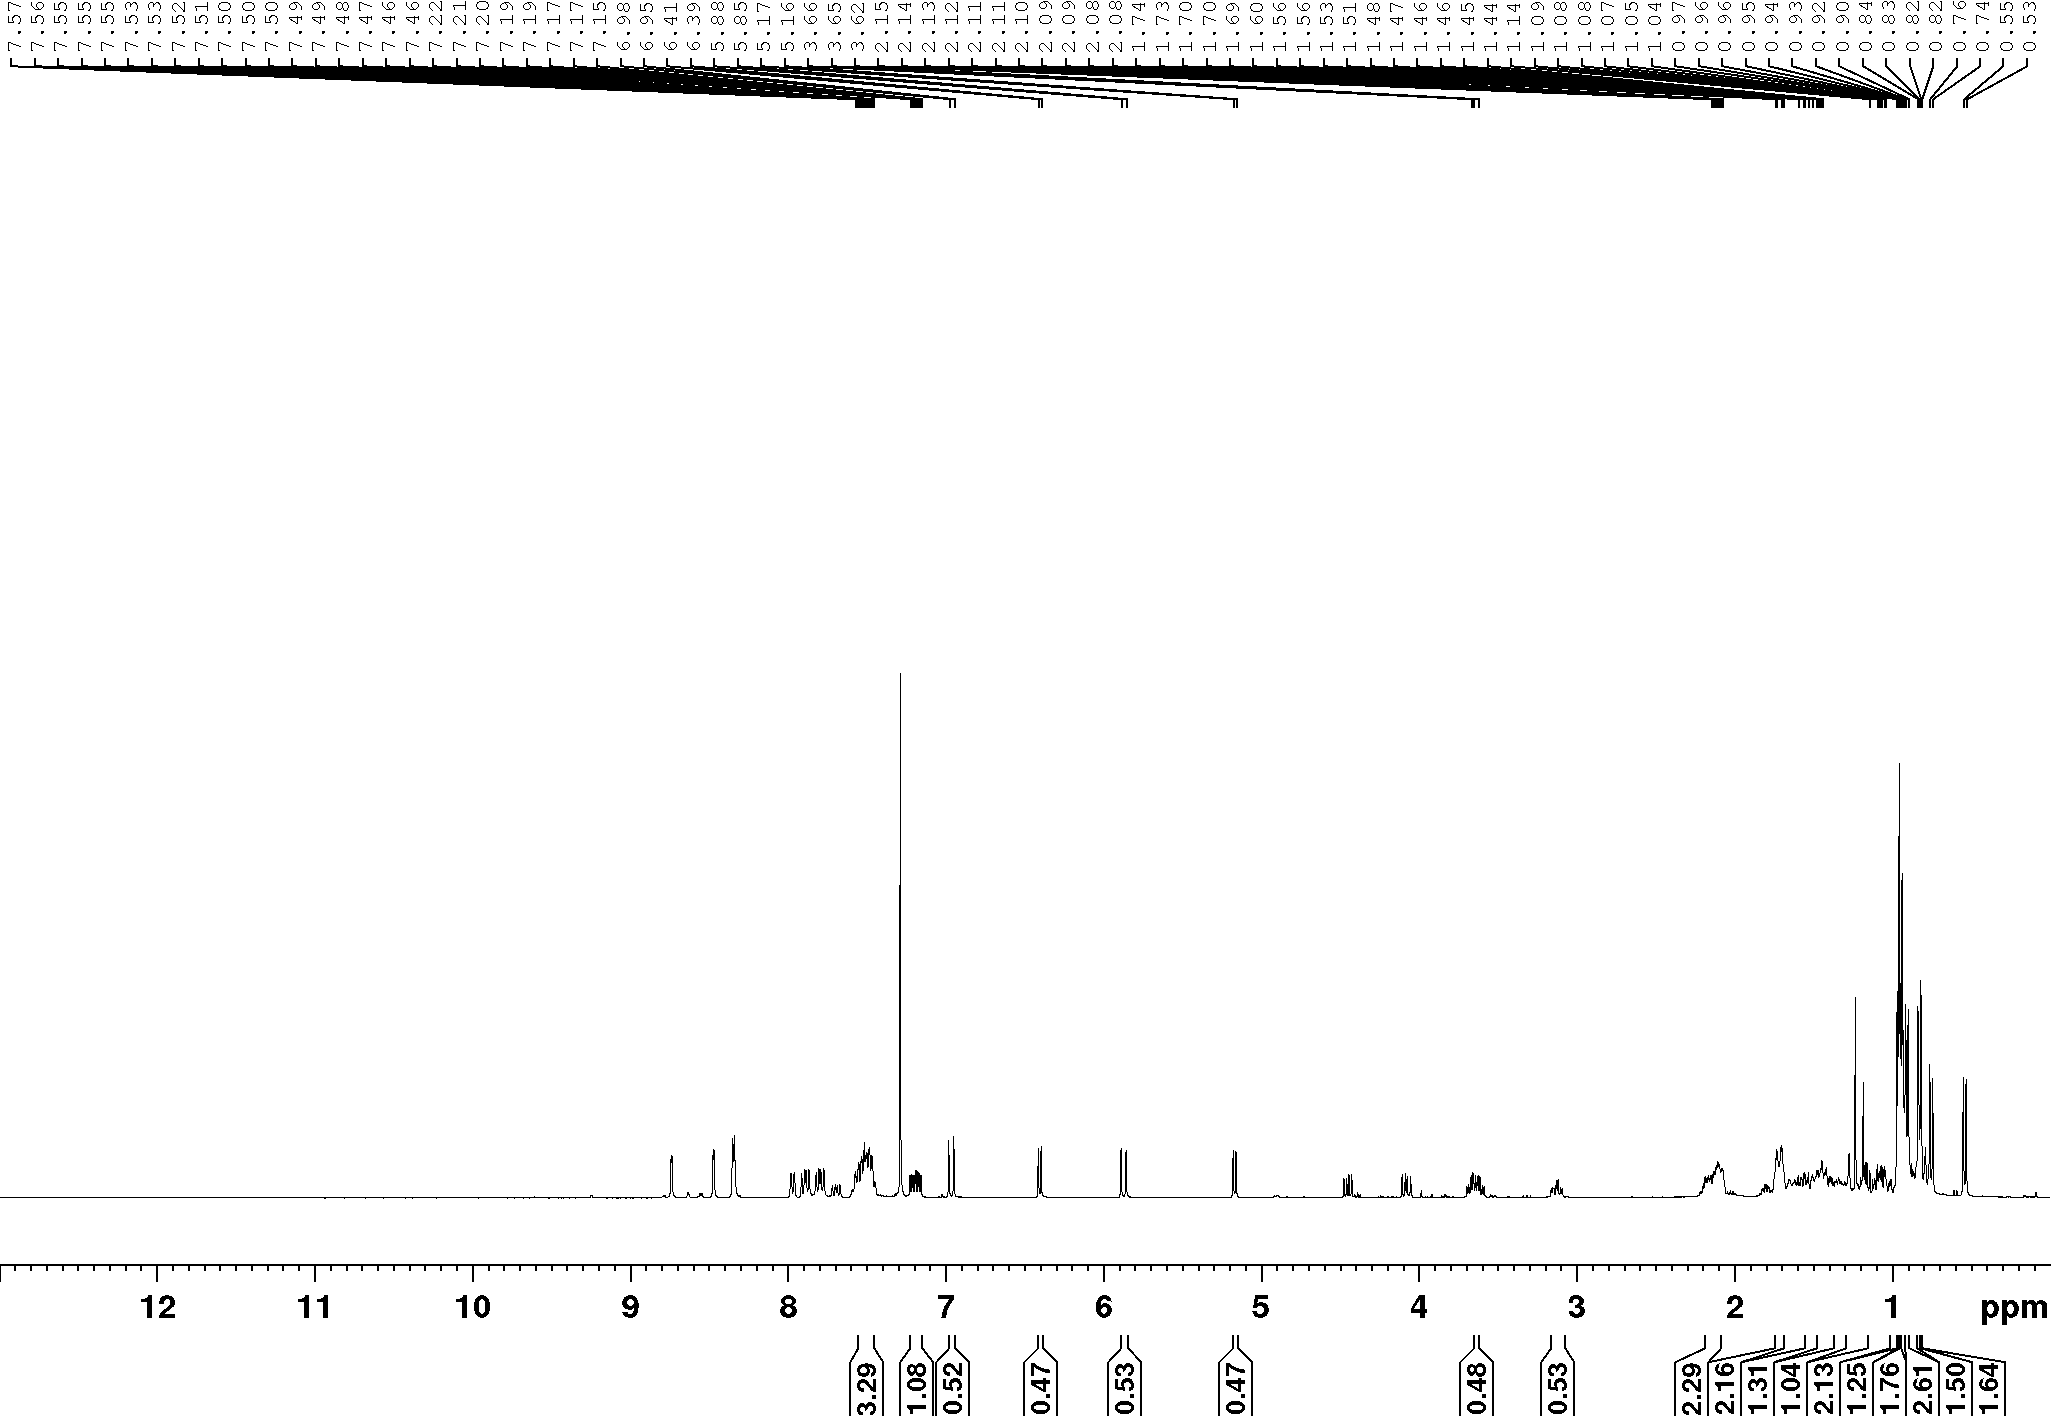

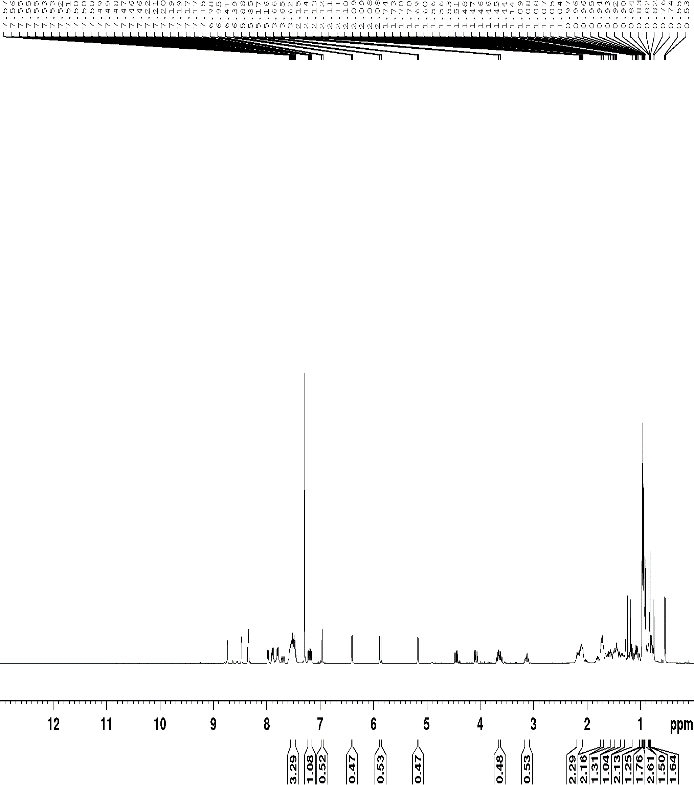


**Figure S 20:** 13CNMR of 4d-d′


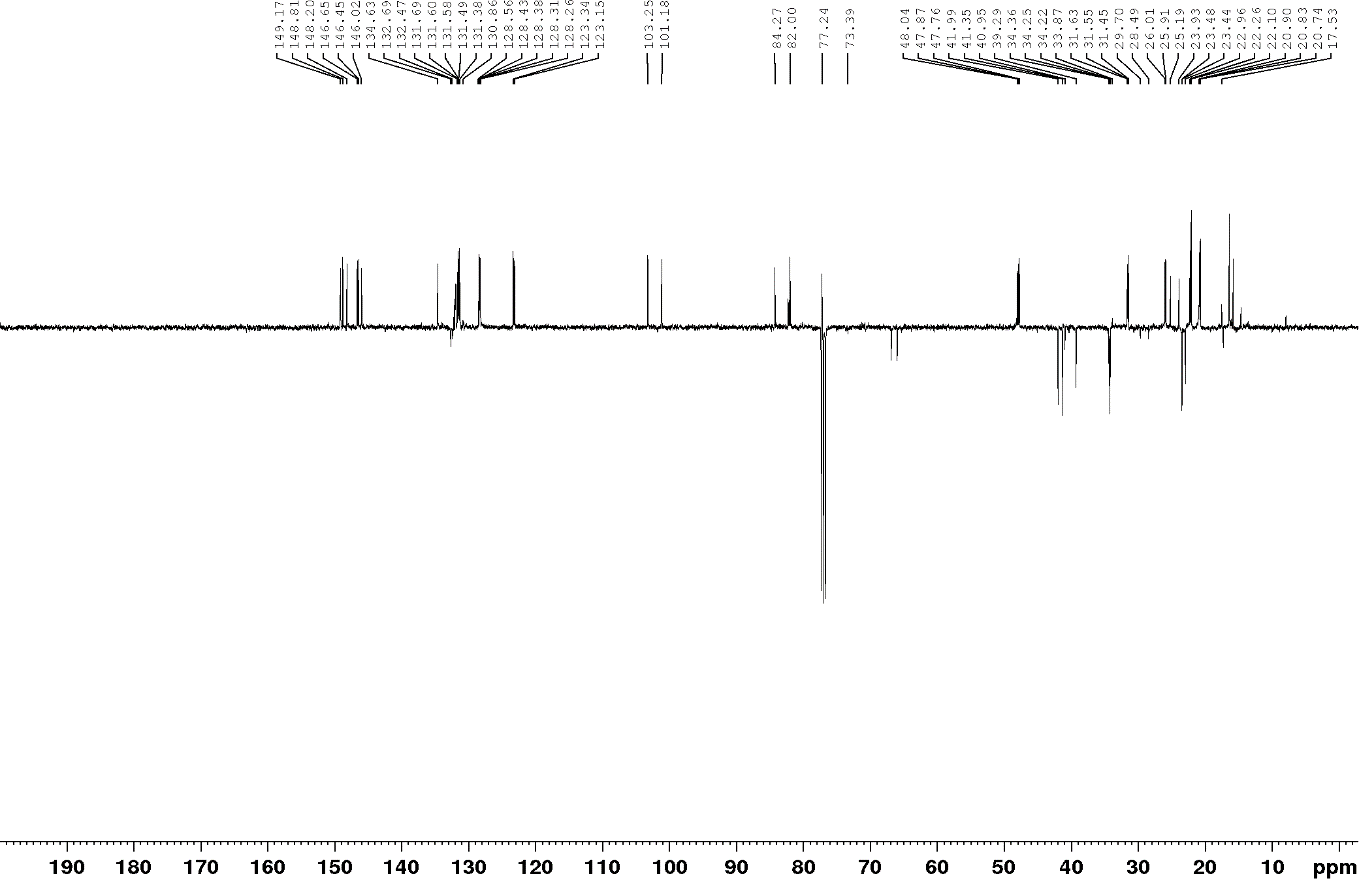


**Figure S 21:** 1HNMR of 4e-e′


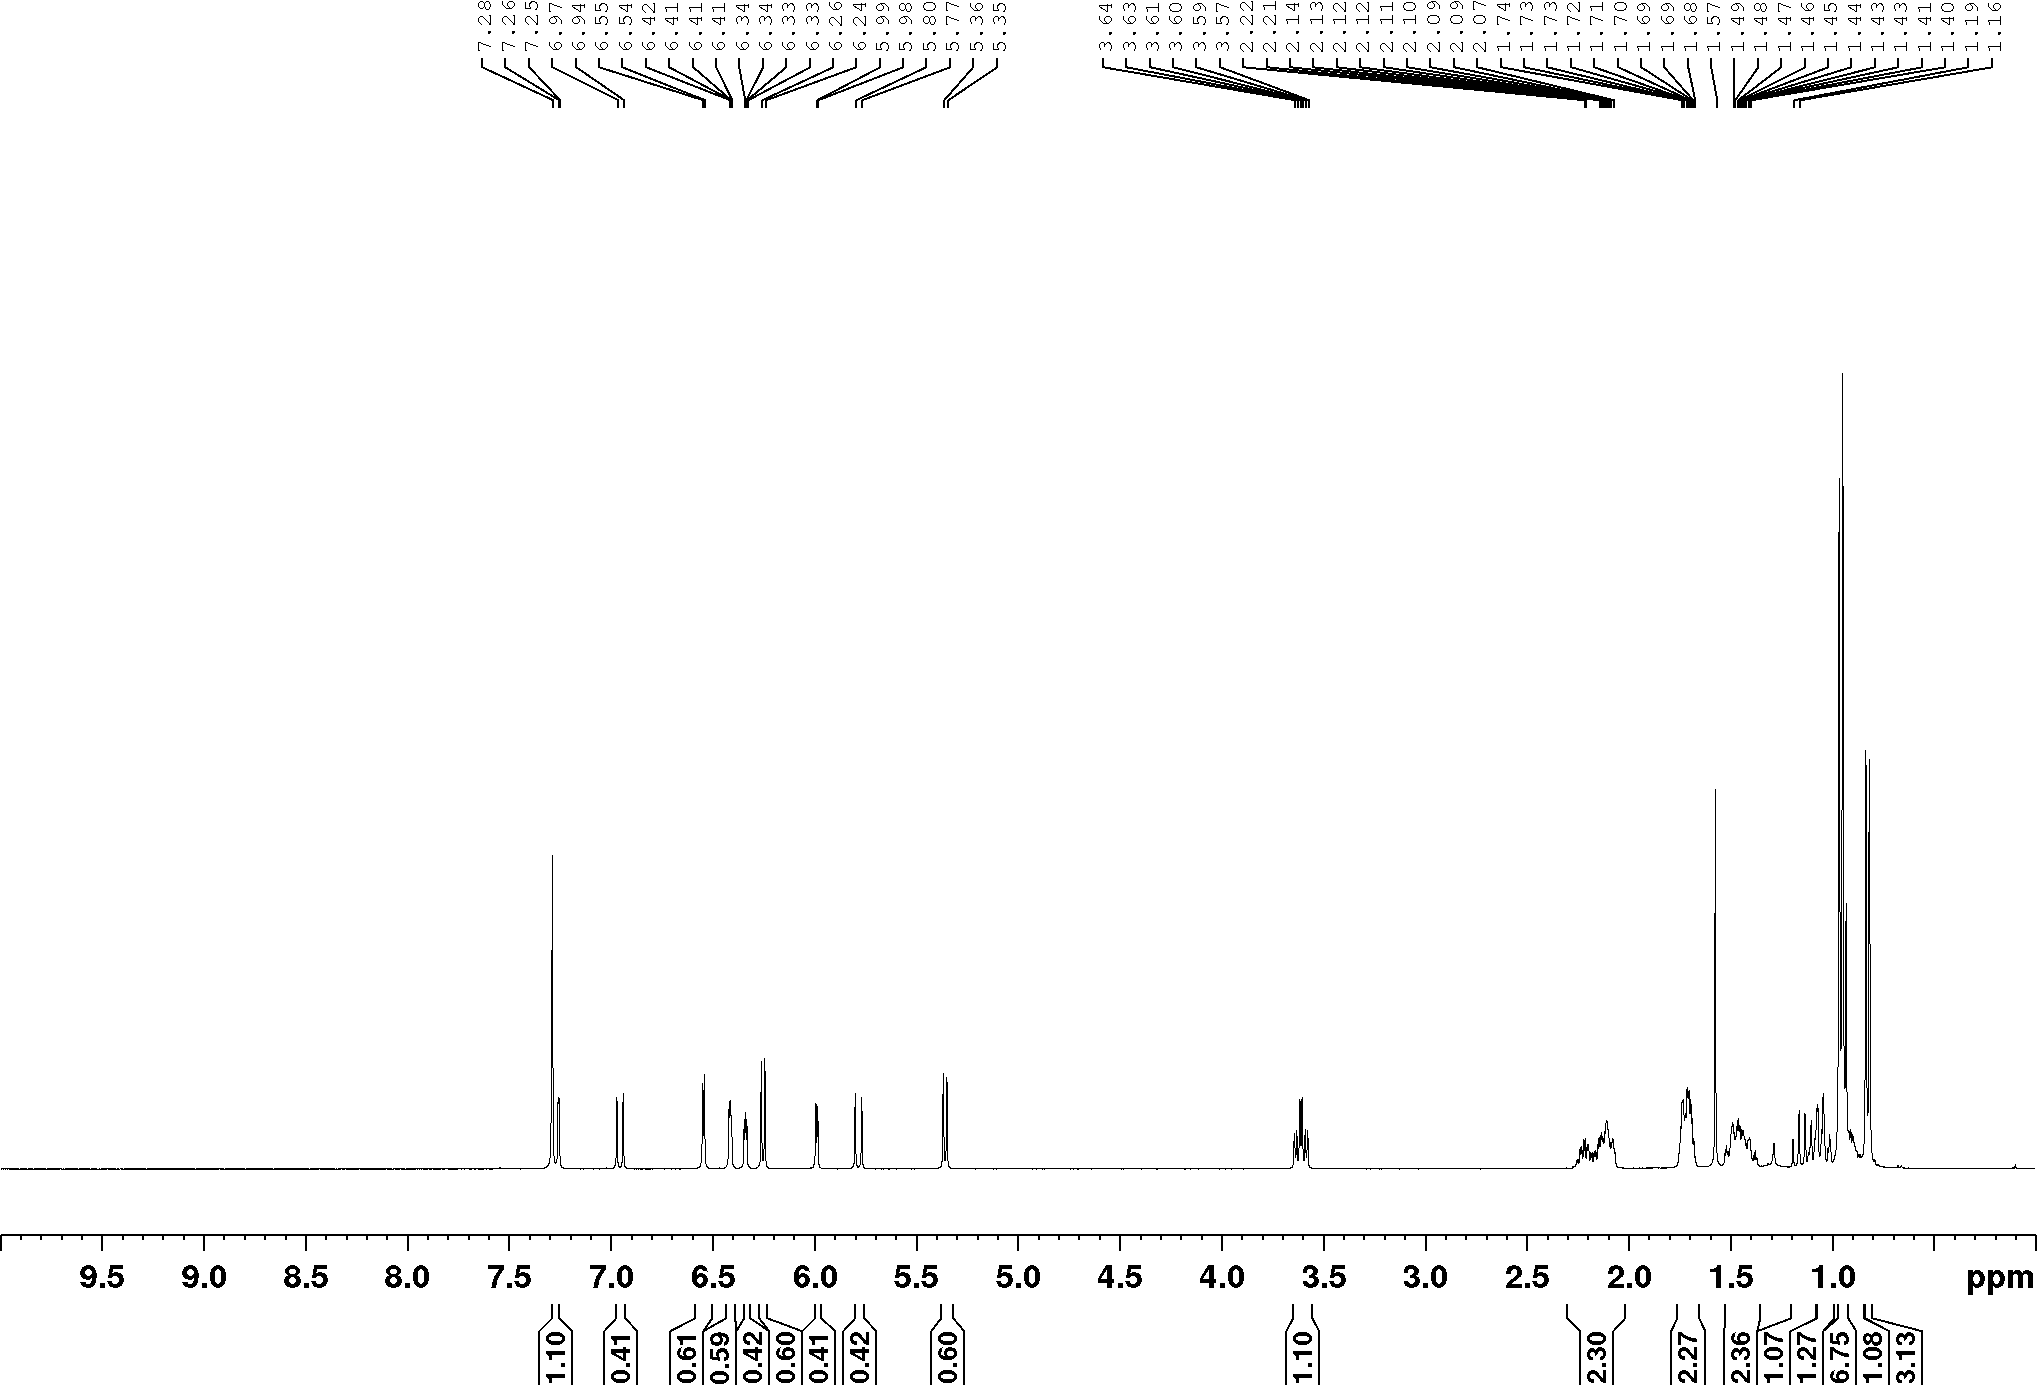

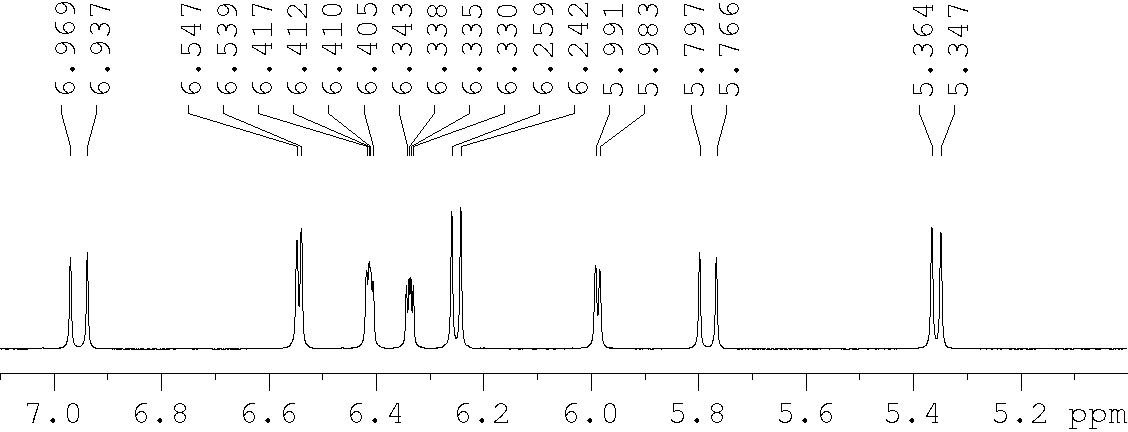


**Figure S 22:** 13CNMR of 4e-e′


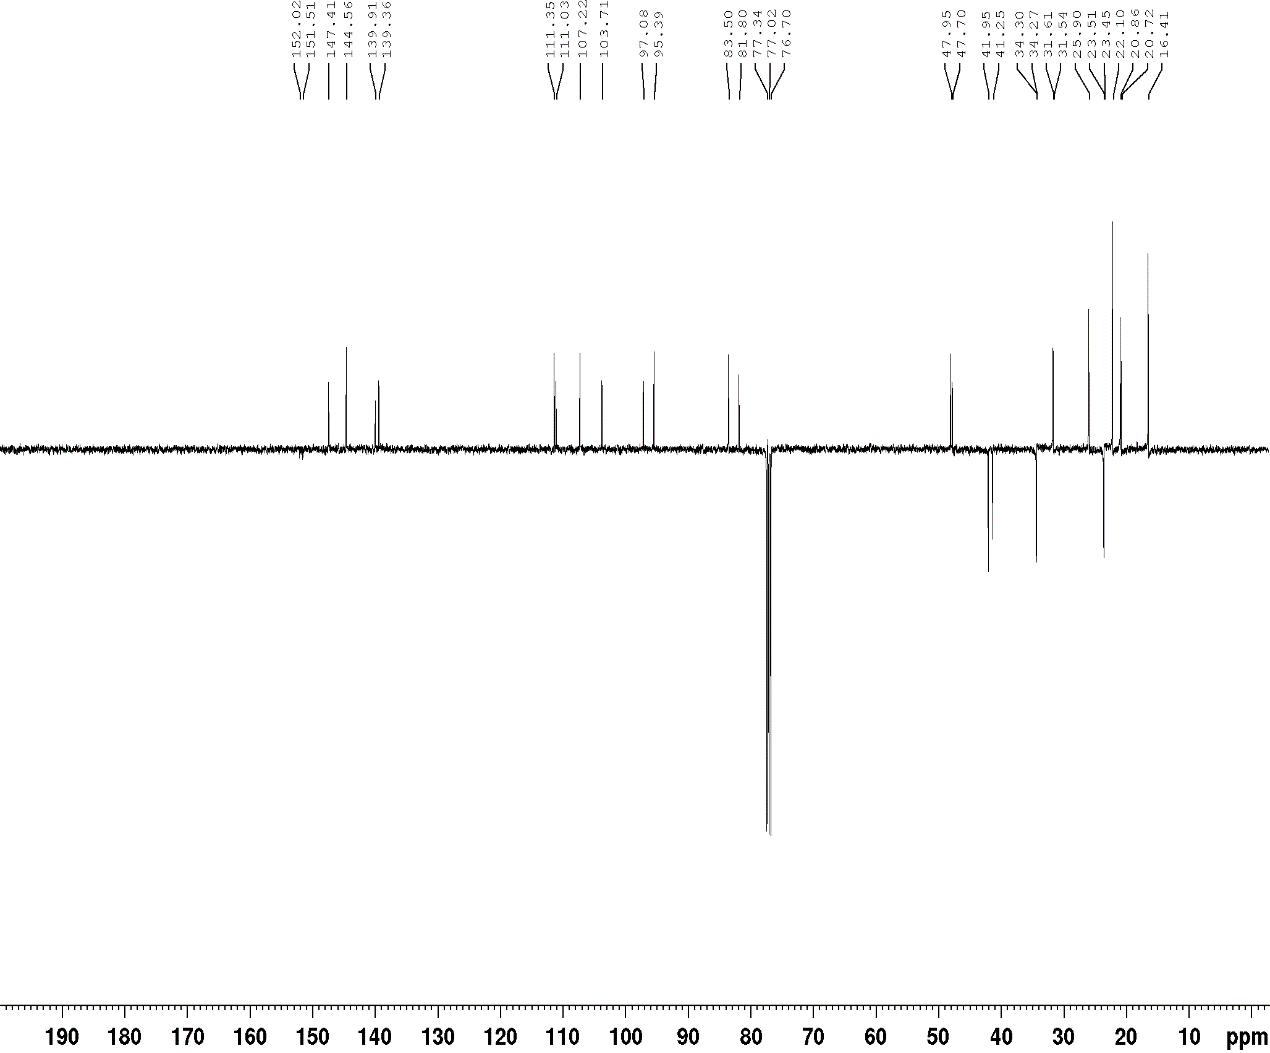


**Figure S 23:** 1HNMR of 4f


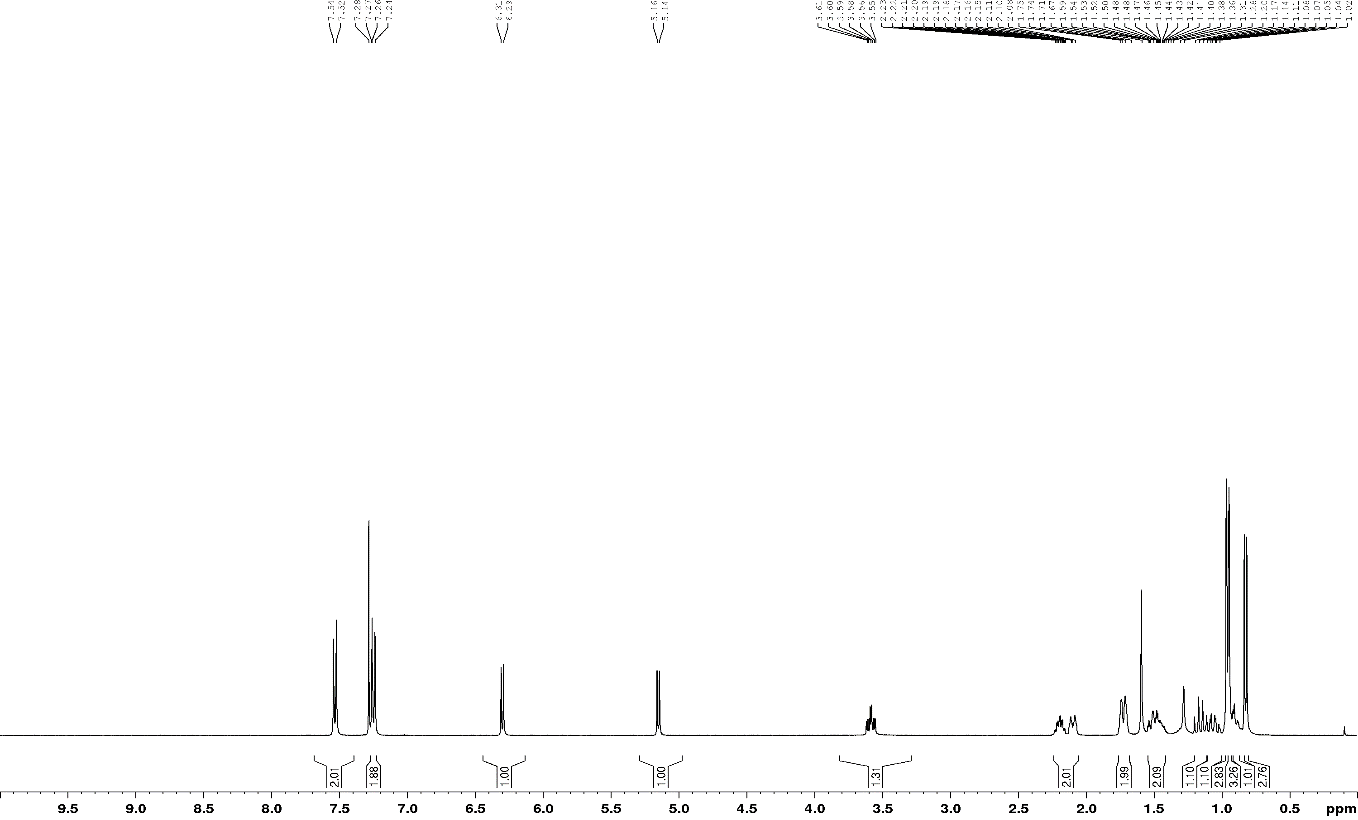


**Figure S 24:** 13CNMR of 4f


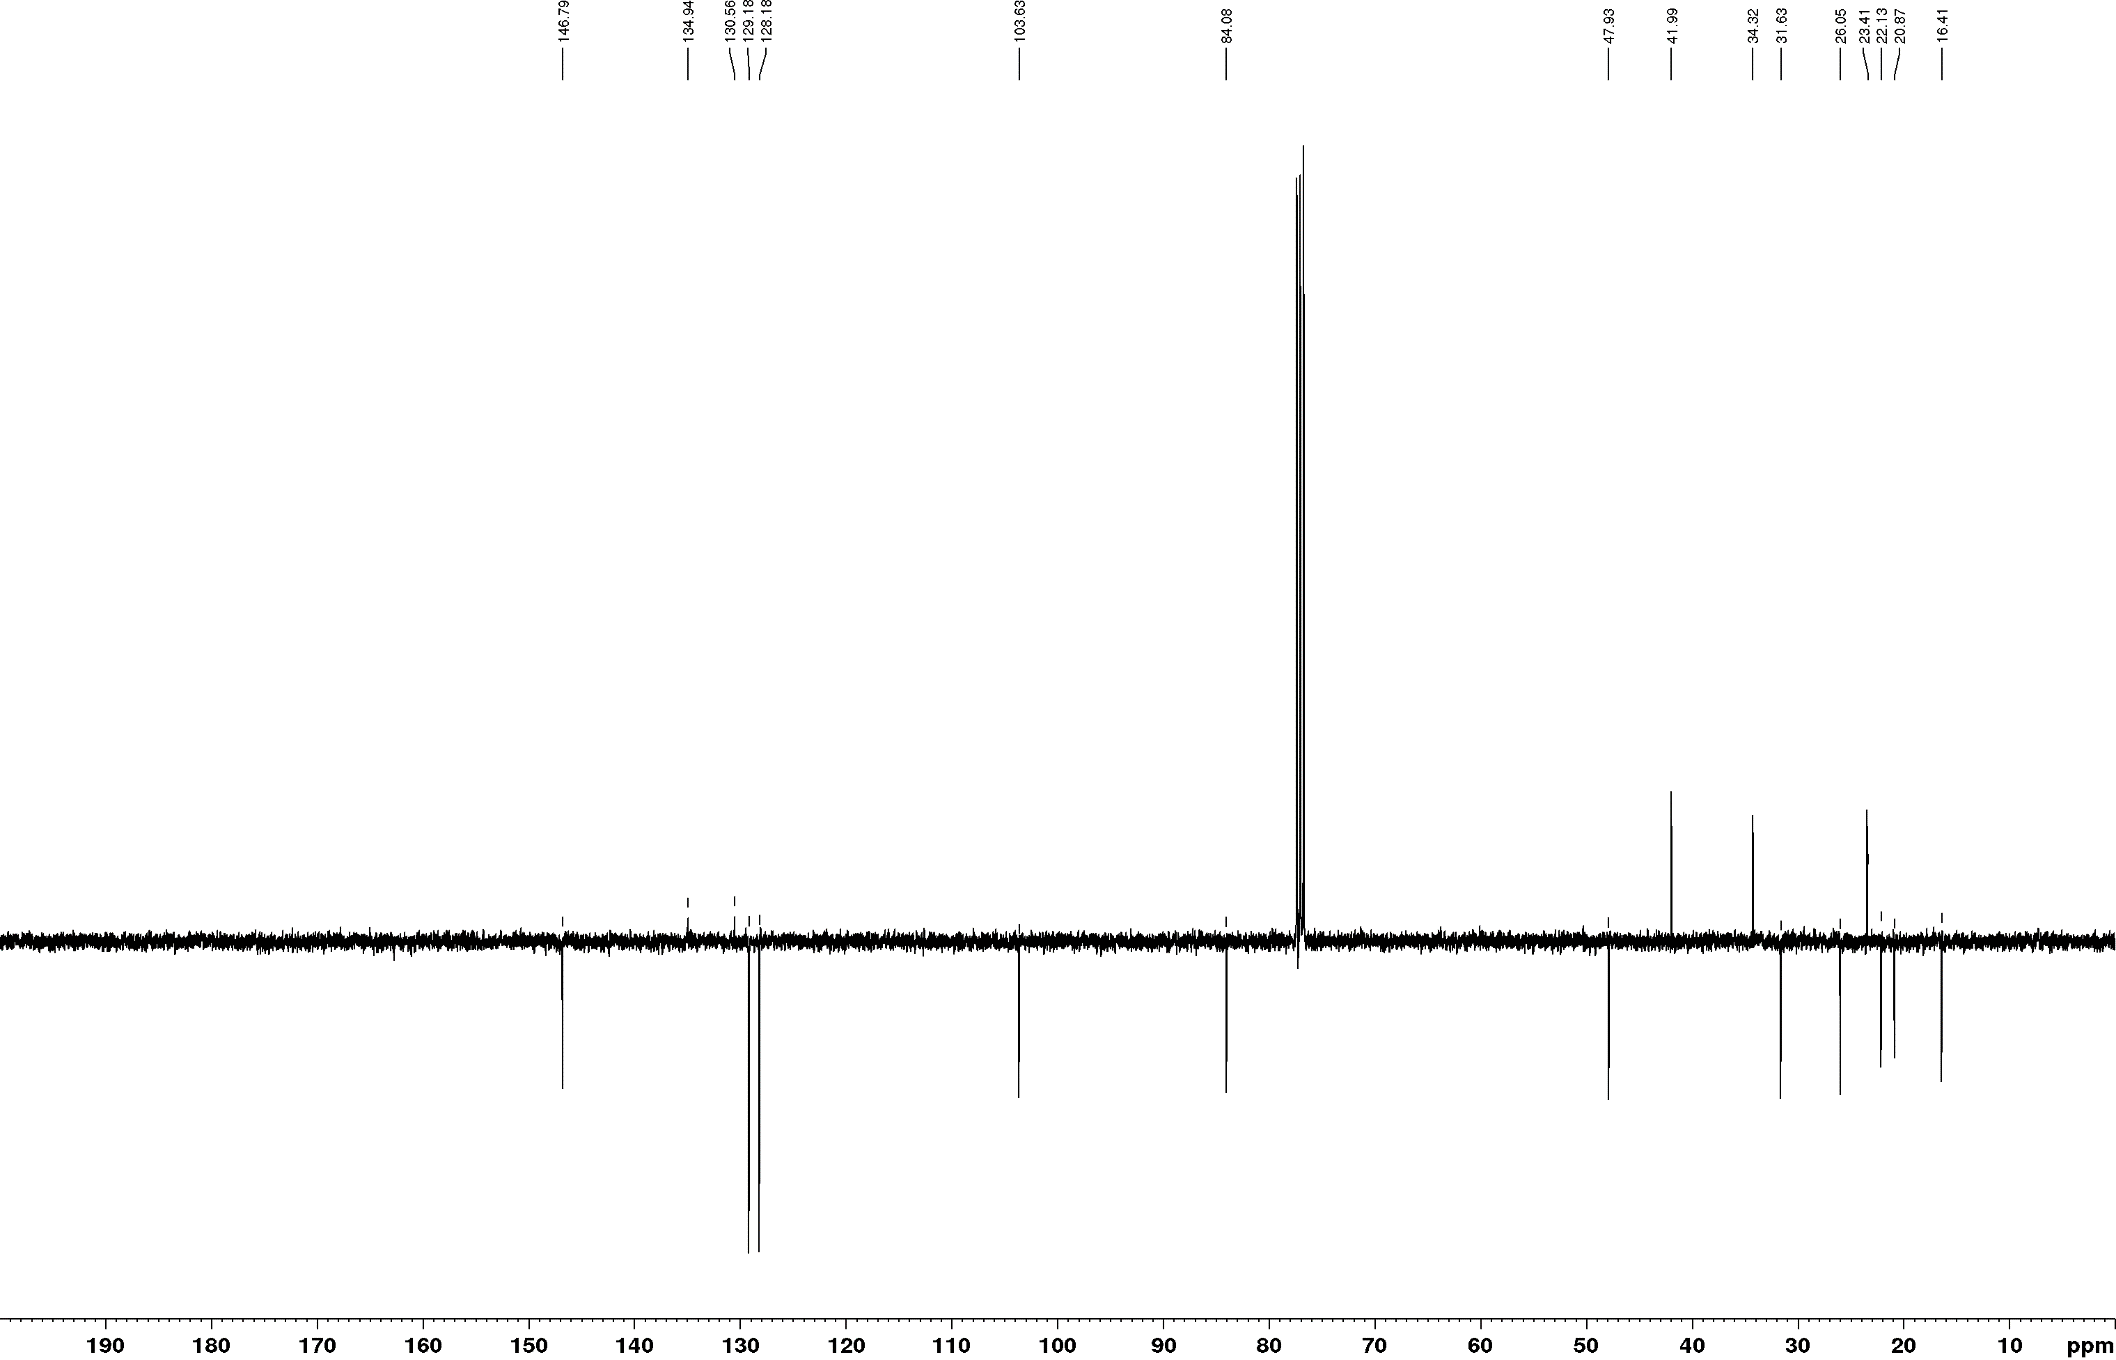


**Figure S 25:** 1HNMR of 4f′


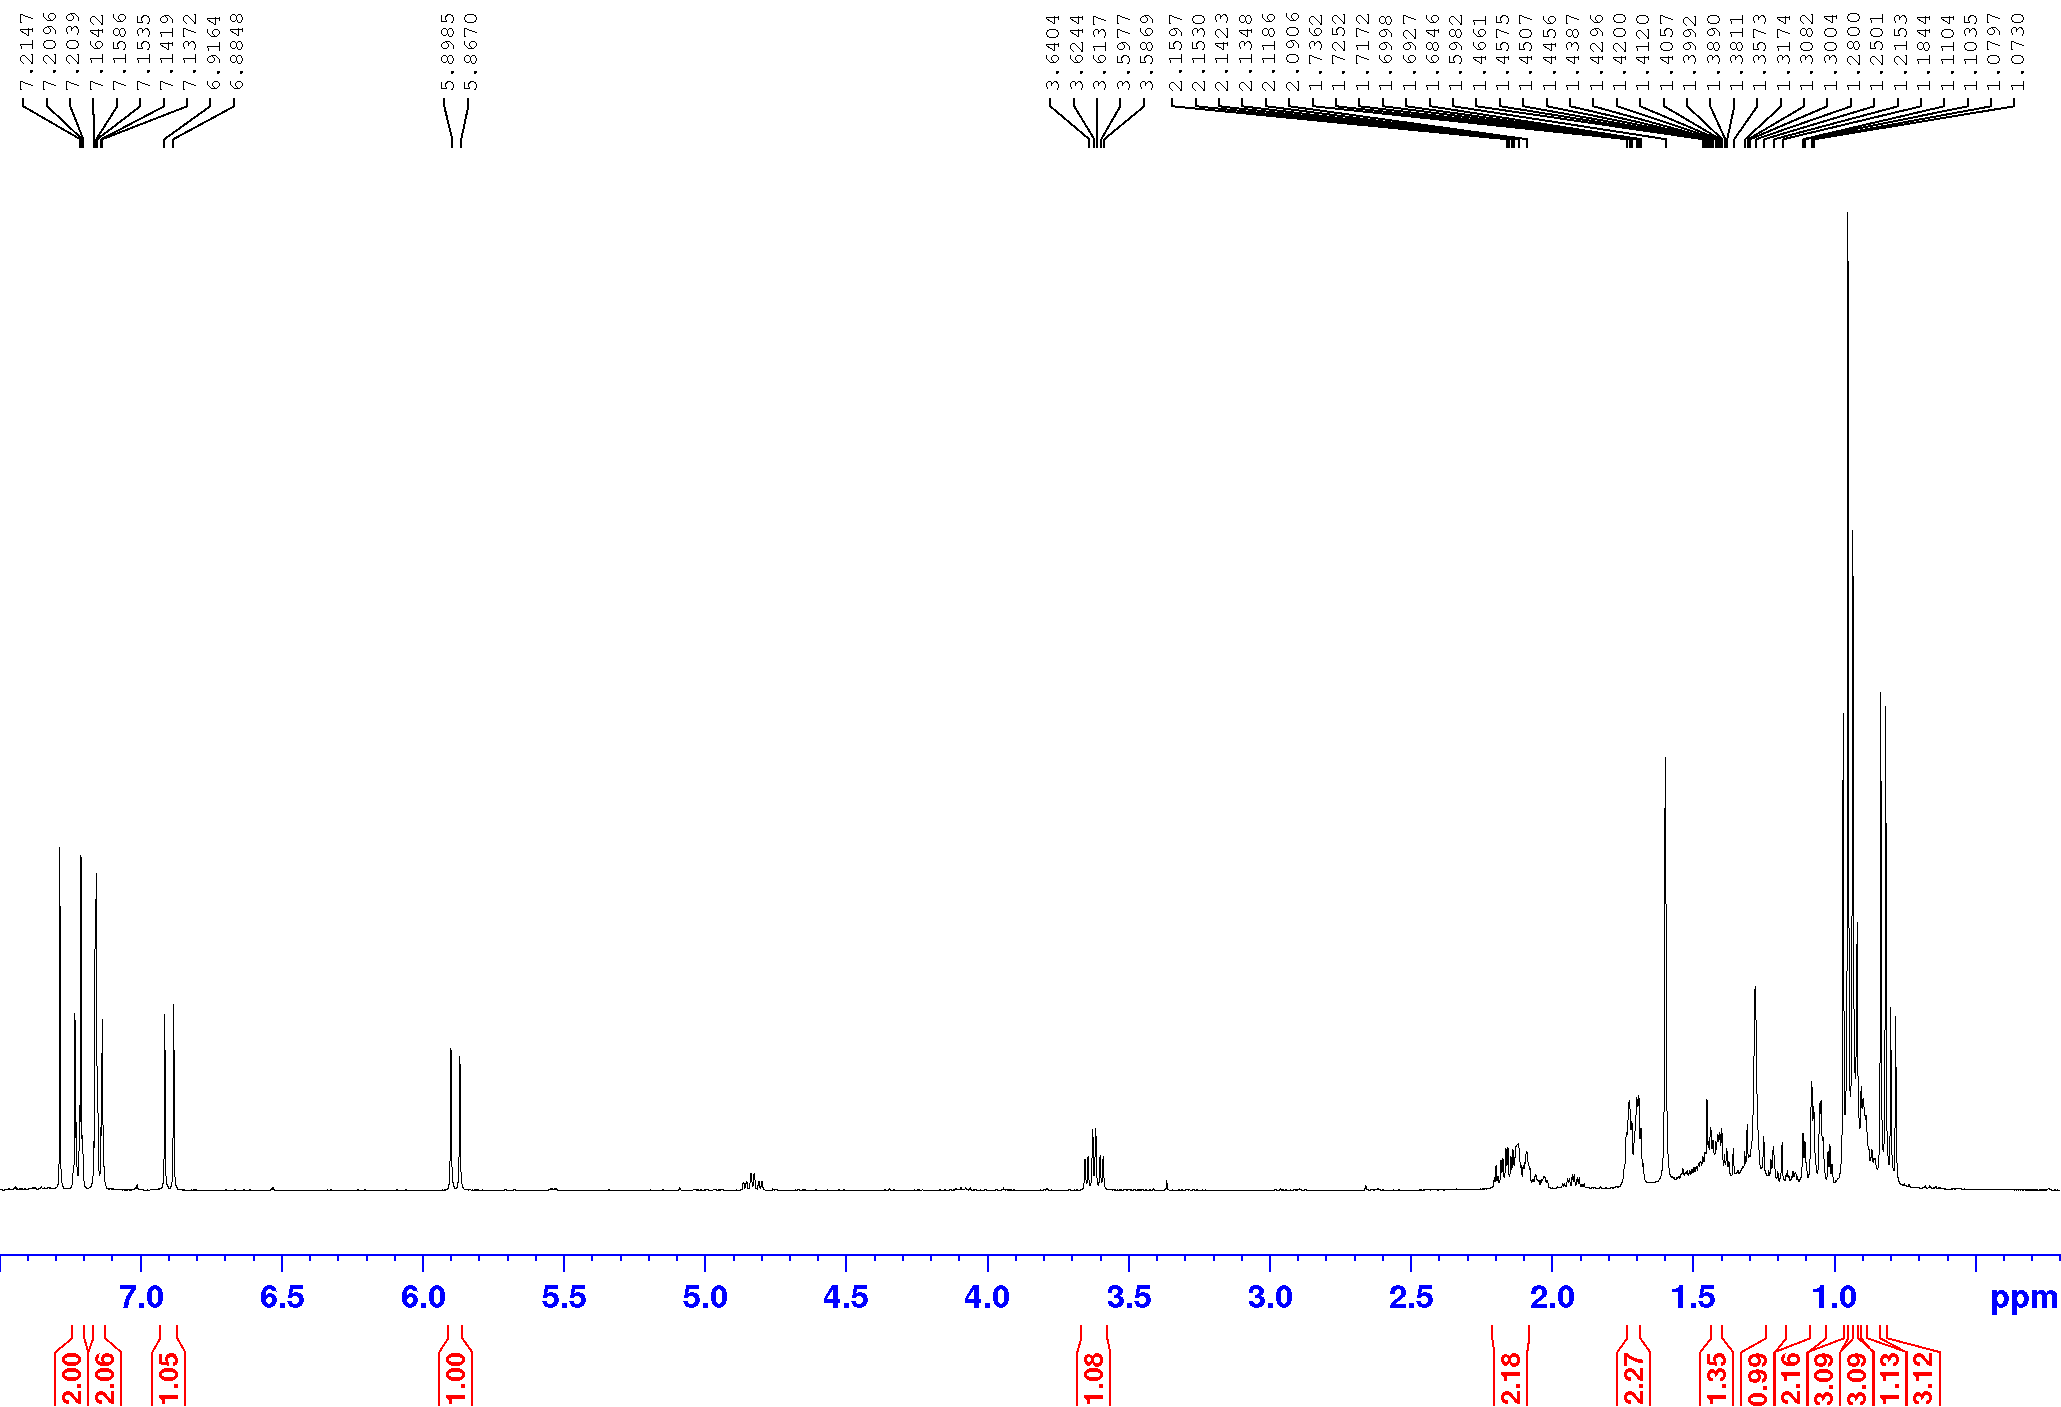


**
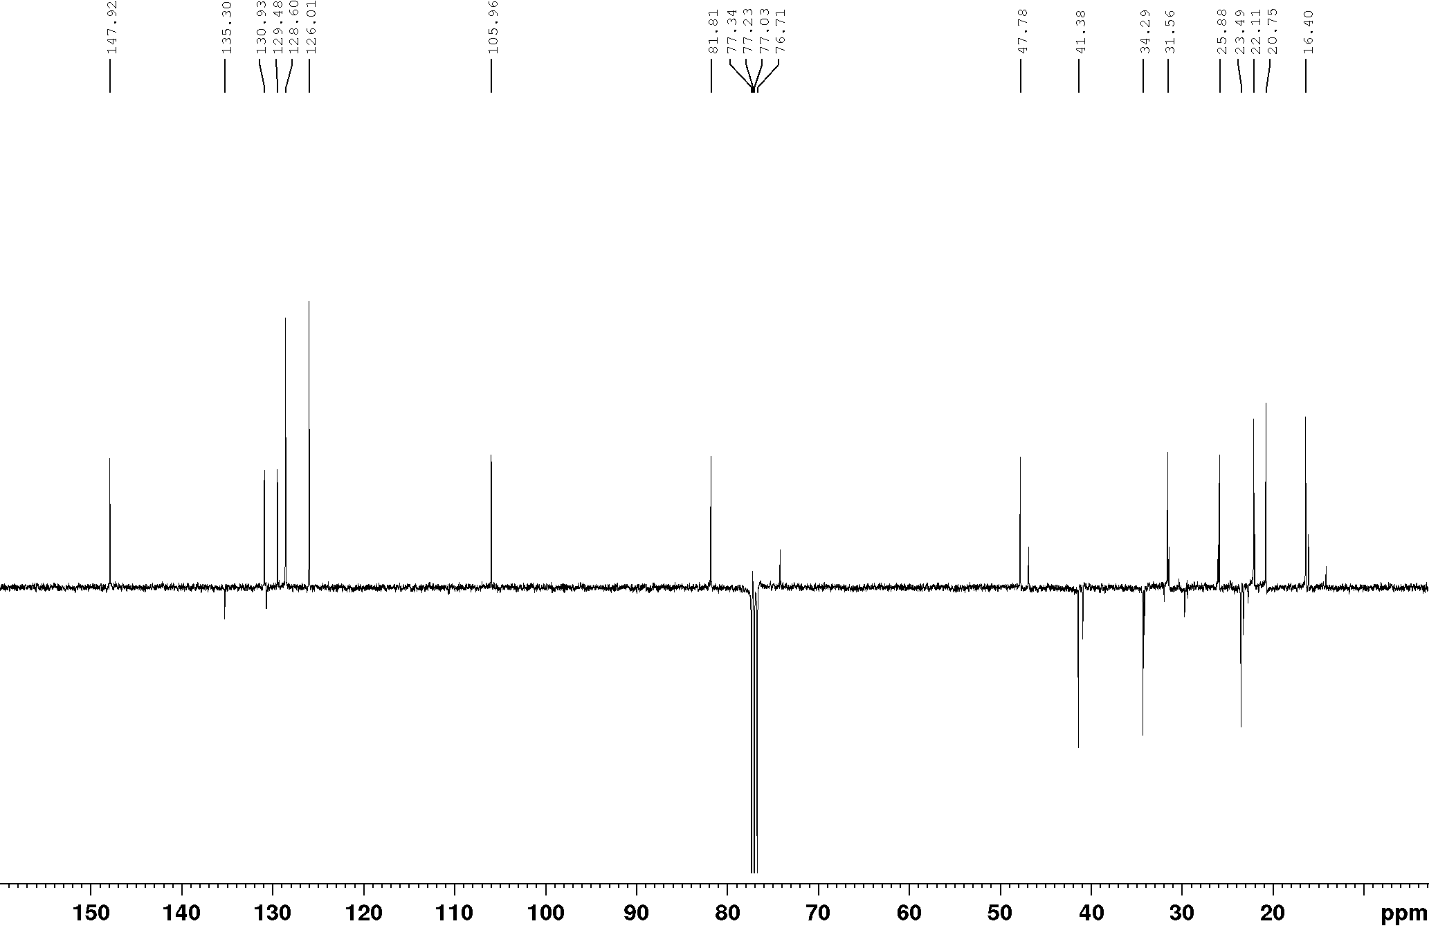
Figure S 26:** 13CNMR of 4f′

**References**

S1 (a) D. A. Wiebe and D. J. Burton. Chemoselective halogenation of 2-hydroperfluoroalkyl aldehydes. *J. Fluorine Chem*. 2012, 139, 4-11. [DOI: org/10.1016/j.jfluchem.2012.03.013](https://doi.org/10.1016/j.jfluchem.2012.03.013). (b) Ko, K. Y., Wagner, S., Yang, S. H., Furkert, D. P., & Brimble, M. A. Improved synthesis of the unnatural amino acids AHMOD and AMD, components of the anticancer peptaibol culicinin D. J. Org. Chem, 2015, 80, 8631-8636. DOI: 10.1021/acs.joc.5b01265.

S2 Wittig, G., Böll, W., & Krück, K. H. Über Phosphin‐alkylene als olefinbildende Reagenzien, VI. Zur Synthese von Alkyl‐und Aryl‐vinyläthern auf der Phosphylen‐Basis. *Chem. Ber*., 1962, 95, 2514-2525.

S3 H. Y. Gondal, Z. M. Cheema, J. H. Zaidi, S. Yousuf, & M. I. Choudhary, Facile synthesis of α-alkoxymethyltriphenylphosphonium iodides: new application of PPh3/I2. *Chem. Cent. J*. 2018, 12, 62. DOI: 10.1186/s13065-018-0421-6.

S4 U. Pindur, G. Lutz, M. Rogge. First synthesis of chiral 3‐vinylindoles as 4π‐components for Diels‐Alder reactions, *J. Heterocycl. Chem*. 1995, 32, 201. DOI: abs/10.1002/jhet.5570320133.
